# Supplementary material for: Inhibitory Effects of Mangifera indica Secondary Metabolites and Their Synthetic Derivatives against SARS-CoV-2 Mpro and NS2B/NS3 (ZIKV and DENV-2)
Source: PubMed Central journal article supplement (PMC11541513; doi:10.1021/acsomega.4c07148), 2024-10-24
Supplement: ao4c07148_si_001.pdf [file ao4c07148_si_001.pdf]

**Inhibitory effects of *Mangifera indica* secondary metabolites and their synthetic derivatives against SARS-CoV-2 M<sup>Pro</sup> and NS2B/NS3 (ZIKV and DENV-2).**

Gabriella B. Souza,<sup>a</sup> Carime L. M. Pontes,<sup>a</sup> Geovanna de O. Costa,<sup>a,b</sup> Natália F. de Sousa,<sup>c</sup> Tiago Tizziani,<sup>a</sup> Luiz Antonio E. Pollo,<sup>d</sup> Bibiana P. Dambrós,<sup>e</sup> Marcus T. Scotti,<sup>c</sup> Mario Steindel,<sup>e</sup> Antonio L. Braga,<sup>a</sup> Tanja Schirmeister,<sup>b</sup> Francisco F. de Assis,<sup>a</sup> and Louis P. Sandjo<sup>a,\*</sup>

a Programa de Pósgraduação em Química, Department of Chemistry, CFM, Universidade Federal de Santa Catarina, 88040-900, Florianópolis, SC, Brazil

b Johannes Gutenberg Universität Mainz, Institute of Pharmacy and Biochemistry Staudingerweg 5 Mainz, DE 55128, Germany.

c Chemistry Department, Exact and Nature Sciences Center, Federal University of Paraíba, Campus I, 58.051-900, João Pessoa, PB, Brazil

d Department of Pharmaceutical Sciences, CCS, Universidade Federal de Santa Catarina, 88040-900, Florianópolis, SC, Brazil

e Department of Microbiology, Immunology and Parasitology, Universidade Federal de Santa Catarina, 88040-900 Florianópolis, SC, Brazil

---

\*Correspondence to Professor Dr Louis P. Sandjo, Department of Chemistry, CFM, Universidade Federal de Santa Catarina, Campus Universitário-Trindade, 88040-900, Florianópolis, SC, Brazil, Email: [p.l.sandjo@ufsc.br](mailto:p.l.sandjo@ufsc.br); Tel: +554837213624

Taraxerol (**1**): White solid; m.p: 280-282 °C; IR (KBr, cm<sup>-1</sup>):  $\nu_{\text{Max}}$  3400, 2840, 1600, 1465, 1375; <sup>1</sup>H NMR (CDCl<sub>3</sub>; 200 MHz):  $\delta$  5.5 (*dd*, *J*=8,0 Hz e 4,0 Hz, 1H),  $\delta$  3.24-3.15 (*m* 1H),  $\delta$  1.32-1.64 (*m*),  $\delta$  0,82-1,25 (*m*); <sup>13</sup>C NMR (CDCl<sub>3</sub>, 50 MHz):  $\delta$  158.2,  $\delta$  117.0,  $\delta$  79.2,  $\delta$  37.7,  $\delta$  27.3,  $\delta$  37.7,  $\delta$  55.7,  $\delta$  18.9,  $\delta$  35.3,  $\delta$  41.5,  $\delta$  48.9,  $\delta$  37.9,  $\delta$  17.6,  $\delta$  37.9,  $\delta$  36.8,  $\delta$  36.8,  $\delta$  41.5,  $\delta$  49.5,  $\delta$  41.5,  $\delta$  30.8,  $\delta$  33.8,  $\delta$  33.3,  $\delta$  28.2,  $\delta$  17.6,  $\delta$  15.6,  $\delta$  26.0,  $\delta$  30.8,  $\delta$  28.2,  $\delta$  33.5,  $\delta$  21.5. <sup>1</sup>.

Methyl gallate (**2**): Yellow solid; m.p: 197-200 °C; IR (KBr, cm<sup>-1</sup>):  $\nu_{\text{Max}}$  3400, 3100, 1675, 1540, 1000; <sup>1</sup>H NMR (CD<sub>3</sub>OD; 200 MHz):  $\delta$  7.04 (*s*, 2H),  $\delta$  3.81 (*s*, 3H); <sup>13</sup>C NMR (CD<sub>3</sub>OD, 50 MHz):  $\delta$  169.0,  $\delta$  146.5,  $\delta$  139.7,  $\delta$  121.4,  $\delta$  110.0,  $\delta$  52.2. Calculated for (C<sub>8</sub>H<sub>9</sub>O<sub>5</sub><sup>+</sup>) *m/z* [M+H]<sup>+</sup> = 185,0450, found, 185,0453.<sup>7</sup>

### Semisynthetic compound

Taraxerone (**1a**): White solid; m.p: 226-230 °C; Yield: 85%; IR (KBr, cm<sup>-1</sup>):  $\nu_{\text{Max}}$  2970, 2865, 1680, 1465, 1375; <sup>1</sup>H NMR (300 MHz, CDCl<sub>3</sub>)  $\delta$  5.56 (*m*, 1H),  $\delta$  0.83-2.58 (*m*); <sup>13</sup>C NMR (75 MHz, CDCl<sub>3</sub>):  $\delta$  217.7,  $\delta$  157.7,  $\delta$  117.3,  $\delta$  37.8,  $\delta$  38.5,  $\delta$  48.9,  $\delta$  20.1,  $\delta$  35.6,  $\delta$  38.5,  $\delta$  48.9,  $\delta$  17.6,  $\delta$  37.8,  $\delta$  38.5,  $\delta$  36.8,  $\delta$  35.9,  $\delta$  48.9,  $\delta$  40.7,  $\delta$  30.1,  $\delta$  34.3,  $\delta$  33.2,  $\delta$  26.2,  $\delta$  14.9,  $\delta$  30.1,  $\delta$  36.8,  $\delta$  33.5,  $\delta$  21.6.

### Synthetic compounds

Isopropyl Gallate (**2a**): Brown oil ; Yield: 70%; IR (KBr, cm<sup>-1</sup>):  $\nu_{\text{Max}}$  3495, 2965, 1690, 1650, 1466, 1310; <sup>1</sup>H NMR (400 MHz, CD<sub>3</sub>OD)  $\delta$  5.11 (*hept*, *J* = 6.40 Hz, 1H);  $\delta$  7.03 (*s*, 2H);  $\delta$  1.32 (*d*, *J*= 8.0 Hz, 6H); <sup>13</sup>C NMR (100 MHz, CD<sub>3</sub>OD)  $\delta$  168.0;  $\delta$  146.4;  $\delta$  139.6;  $\delta$  122.1;  $\delta$  109.9;  $\delta$  69.1;  $\delta$  22.1. Calculated for (C<sub>10</sub>H<sub>13</sub>O<sub>5</sub><sup>+</sup>) *m/z* [M+H]<sup>+</sup>= 213.0758; found 213.0513.

Tetradecyl Gallate (**2b**): Brown oil; Yield: 65%; IR (KBr, cm<sup>-1</sup>):  $\nu_{\text{Max}}$  3400, 2970, 2850, 1700, 1580, 1250; <sup>1</sup>H NMR (400 MHz, CD<sub>3</sub>OD):  $\delta$  7.04 (*s*, 2H);  $\delta$  4.21 (*t*, *J*= 8.0 Hz and *J*= 4.0 Hz, 2H),  $\delta$  1.28-1.73 (*m*, 27H),  $\delta$  0.90 (*t*, *J*= 4.0 Hz and *J*= 8.0 Hz, 3H); <sup>13</sup>C NMR (100 MHz, CD<sub>3</sub>OD):  $\delta$  168.6;  $\delta$  146.6,  $\delta$  109.9,  $\delta$  65.7,  $\delta$

33.0,  $\delta$  30.7;  $\delta$  30.4;  $\delta$  29.9;  $\delta$  26.7,  $\delta$  23.7,  $\delta$  14.4. Calculated for (C<sub>21</sub>H<sub>35</sub>O<sub>5</sub><sup>+</sup>) m/z [M+H]<sup>+</sup> = 367.2479. found, 367.2505.

But-3-enyl Gallate (**2c**): Brown oil; Yield: 90%; IR (KBr, cm<sup>-1</sup>):  $\nu_{\text{Max}}$  3450, 2950, 1690, 1650, 1580, 1300, 1000; <sup>1</sup>H NMR (300 MHz, CD<sub>3</sub>OD):  $\delta$  7.05 (s, 2H);  $\delta$  5.88 (*m*, 1H);  $\delta$  5.12 (*dd*, *J* = 27.0 Hz, *J* = 18.0 Hz, 2H),  $\delta$  4.26 (*t*, *J* = 9.0 Hz, 2H),  $\delta$  2.47 (*q*, *J* = 6.0 Hz, 2H). <sup>13</sup>C NMR (75 MHz, CD<sub>3</sub>OD):  $\delta$  168.4;  $\delta$  146.4;  $\delta$  139.7;  $\delta$  135.5;  $\delta$  121.5;  $\delta$  117.5;  $\delta$  110.0;  $\delta$  64.8;  $\delta$  34.3. Calculated for (C<sub>11</sub>H<sub>13</sub>O<sub>5</sub><sup>+</sup>) m/z [M+H]<sup>+</sup> = 225.0763, found, 225.0772.

Allyl Gallate (**2d**): Brown oil; Yield: 85%; IR (KBr, cm<sup>-1</sup>):  $\nu_{\text{Max}}$  3450, 2960, 1690, 1650, 1500, 1300; 1000. <sup>1</sup>H NMR (300 MHz, CD<sub>3</sub>OD):  $\delta$  7.07 (s, 2H);  $\delta$  6.03 *m*, 1H);  $\delta$  5.30 (*dd*, *J* = 18.0 Hz, *J* = 42.0 Hz, 2H),  $\delta$  4.72 (*d*, *J* = 6.0 Hz, 2H), <sup>13</sup>C NMR (75 MHz, CD<sub>3</sub>OD). <sup>13</sup>C NMR (75 MHz, CD<sub>3</sub>OD):  $\delta$  168.0;  $\delta$  146.5;  $\delta$  139.8;  $\delta$  133.9;  $\delta$  121.4;  $\delta$  117.9;  $\delta$  110.0;  $\delta$  66.1. Calculated for (C<sub>10</sub>H<sub>11</sub>O<sub>5</sub><sup>+</sup>) m/z [M+H]<sup>+</sup> = 211.0606, found, 211.0623.

Isoamyl Gallate (**2e**): Brown oil; Yied: 85%; IR (KBr, cm<sup>-1</sup>):  $\nu_{\text{Max}}$  3450, 2950, 2880; 1690, 1650, 1500, 1000; <sup>1</sup>H NMR (300 MHz, CD<sub>3</sub>OD):  $\delta$  7.05 (s, 2H);  $\delta$  4.26 (*t*, *J* = 6.0 Hz, 2H);  $\delta$  1.78-1.61 (*m*, 3H);  $\delta$  0.97 (*d*, *J* = 6.0 Hz, 6H); <sup>13</sup>C NMR (75 MHz, CD<sub>3</sub>OD):  $\delta$  168.5;  $\delta$  146.4;  $\delta$  139.7;  $\delta$  121.6;  $\delta$  109.9;  $\delta$  64.2;  $\delta$  38.6;  $\delta$  26.4;  $\delta$  22.8. Calculated for (C<sub>12</sub>H<sub>17</sub>O<sub>5</sub><sup>+</sup>) m/z [M+H]<sup>+</sup> = 241.1076, found m/z [M+H-Isoamyl acetate]<sup>+</sup> 241.1086, 171.0297.

Geranyl Gallate (**2f**): Brown oil; Yield: 70%; IR (KBr, cm<sup>-1</sup>):  $\nu_{\text{Max}}$  3450; 2960; 1690; 1640; 1310; 1050; <sup>1</sup>H NMR (300 MHz, CD<sub>3</sub>OD):  $\delta$  7.06 (s, 2H),  $\delta$  5.42 (*sl*, 1H),  $\delta$  5.08 (*m*, 1H), 4.75 (*sl*, 2H),  $\delta$  2.08 (*m*, 4H),  $\delta$  1.75 (*sl*, 3H),  $\delta$  1.64 (*sl*, 3H);  $\delta$  1.58 (s, 3H); <sup>13</sup>C NMR (75 MHz, CD<sub>3</sub>OD):  $\delta$  168.0;  $\delta$  146.4,  $\delta$  143.3;  $\delta$  139.6,  $\delta$  132.6,  $\delta$  124.8  $\delta$  121.7;  $\delta$  119.9,  $\delta$  110.0;  $\delta$  62.3;  $\delta$  40.5;  $\delta$  27.3;  $\delta$  25.8;  $\delta$  17.7;  $\delta$  16.5. Calculated for (C<sub>17</sub>H<sub>23</sub>O<sub>5</sub><sup>+</sup>) m/z [M+H]<sup>+</sup> = 307.1545, found 307.1544

Citronellyl gallate (**2g**): Brown oil; Yield: 75%; IR (KBr, cm<sup>-1</sup>):  $\nu_{\text{Max}}$  3450, 2965, 2860, 1690, 1640, 1310, 1050. <sup>1</sup>H NMR (400 MHz, CD<sub>3</sub>OD):  $\delta$  7.06 (s, 2H),  $\delta$  5.04 (*t*, *J* = 8.0 Hz, 1H),  $\delta$  4.25 (*d*, *J* = 8.0 Hz, 2H),  $\delta$  2.00 (*m*, 2H),  $\delta$  1.73 (*m*,

2H),  $\delta$  1.62 (s, 3H),  $\delta$  1.56 (s, 3H),  $\delta$  1.49 (m, 1H),  $\delta$  1.19 (m, 2H).  $^{13}\text{C}$  NMR (100 MHz,  $\text{CD}_3\text{OD}$ ):  $\delta$  168.4;  $\delta$  146.3;  $\delta$  139.6,  $\delta$  132.0,  $\delta$  125.5;  $\delta$  121.6;  $\delta$  110.0;  $\delta$  64.0;  $\delta$  37.9;  $\delta$  36.5;  $\delta$  30.5;  $\delta$  26.3;  $\delta$  25.8;  $\delta$  19.8;  $\delta$  17.7. Calculated for ( $\text{C}_{17}\text{H}_{25}\text{O}_5^+$ )  $m/z$   $[\text{M}+\text{H}]^+ = 309.1702$ , found 309.1717

3-Phenyl-propyl gallate (**2h**): Brown oil; Yield: 80%; IR (KBr,  $\text{cm}^{-1}$ ):  $\nu_{\text{Max}}$  3450, 3003, 2965, 1700, 1650, 1500, 1050;  $^1\text{H}$  NMR (400 MHz,  $\text{CD}_3\text{OD}$ ):  $\delta$  7.23-7.09 (m, 7H);  $\delta$  4.16 (t,  $J=8.0$  Hz, 2H);  $\delta$  2.69 (t,  $J=8.0$  Hz, 2H),  $\delta$  1.96 (q,  $J=8.0$  Hz, 2H);  $^{13}\text{C}$  NMR (100 MHz,  $\text{CD}_3\text{OD}$ ):  $\delta$  168.4;  $\delta$  146.3;  $\delta$  142.2,  $\delta$  139.6;  $\delta$  129.3;  $\delta$  126.8,  $\delta$  121.5;  $\delta$  110.0,  $\delta$  64.8;  $\delta$  33.0;  $\delta$  31.4. Calculated for ( $\text{C}_{16}\text{H}_{17}\text{O}_5^+$ )  $m/z$   $[\text{M}+\text{H}]^+ = 289.1076$  found 289.1080

Linalyl gallate (**2i**): Brown oil; Yield: 73%; IR (KBr,  $\text{cm}^{-1}$ ):  $\nu_{\text{Max}}$  3450, 2973, 2850, 1690, 1640, 1310, 1050;  $^1\text{H}$  NMR (400 MHz,  $\text{CD}_3\text{OD}$ ):  $\delta$  7.03 (s, 2H),  $\delta$  6.05 (dd,  $J=8.0$  Hz,  $J=16.0$  Hz 1H),  $\delta$  5.27 (d,  $J=16.0$  Hz, 1H),  $\delta$  5.17-5.06 (m, 2H),  $\delta$  2.05 (sl, 2H),  $\delta$  1.88-1.82 (m, 2H),  $\delta$  1.63 (s, 3H),  $\delta$  1.57 (s, 3H),  $\delta$  1.29 (s, 3H);  $^{13}\text{C}$  NMR (100 MHz,  $\text{CD}_3\text{OD}$ ):  $\delta$  167.3;  $\delta$  146.4;  $\delta$  143.5;  $\delta$  139.5;  $\delta$  132.7;  $\delta$  124.9;  $\delta$  122.9;  $\delta$  113.4;  $\delta$  109.9;  $\delta$  84.2;  $\delta$  40.7;  $\delta$  25.8;  $\delta$  24.6;  $\delta$  23.5;  $\delta$  17.6. Calculated for ( $\text{C}_{17}\text{H}_{23}\text{O}_5^+$ )  $m/z$   $[\text{M}+\text{H}]^+ = 307.1545$ , found 307.1544.

2-Phenyl-ethyl gallate (**2j**): Brown oil; Yield: 78%; IR (KBr,  $\text{cm}^{-1}$ ):  $\nu_{\text{Max}}$  3450, 3000, 2965, 1700, 1655, 1465, 1300, 1000;  $^1\text{H}$  NMR (400 MHz,  $\text{CD}_3\text{OD}$ ):  $\delta$  7.04 (s, 2H),  $\delta$  7.28-7.16 (m, 5H),  $\delta$  4.40 (t,  $J=4.0$  Hz, 2H),  $\delta$  3.00 (t,  $J=4.0$  Hz, 2H).  $^{13}\text{C}$  NMR (100 MHz,  $\text{CD}_3\text{OD}$ ):  $\delta$  168.4;  $\delta$  146.4,  $\delta$  139.7,  $\delta$  139.4,  $\delta$  129.9,  $\delta$  129.4,  $\delta$  127.4,  $\delta$  121.5,  $\delta$  110.0,  $\delta$  66.4;  $\delta$  36.1. Calculated for ( $\text{C}_{15}\text{H}_{15}\text{O}_5^+$ )  $m/z$   $[\text{M}+\text{H}]^+ = 275.0919$  found 275.0934.

Hex-3-enyl gallate (**2k**): Brown oil; Yield: 65%; IR (KBr,  $\text{cm}^{-1}$ ):  $\nu_{\text{Max}}$  3450, 3000, 2960, 1700, 1675, 1300, 1000.  $^1\text{H}$  NMR (400 MHz,  $\text{CD}_3\text{OD}$ ):  $\delta$  7.04 (s, 2H),  $\delta$  4.22 (t,  $J=4.0$  Hz, 2H),  $\delta$  2.48 (dd,  $J=12.0$  Hz,  $J=8.0$  Hz, 2H),  $\delta$  5.55-5.37 (m, 2H),  $\delta$  2.10 (m, 2H),  $\delta$  0.96 (t,  $J=8.0$  Hz, 3H).  $^{13}\text{C}$  NMR (100 MHz,  $\text{CD}_3\text{OD}$ ):  $\delta$  168.5;  $\delta$  146.4;  $\delta$  135.4;  $\delta$  125.1;  $\delta$  121.6;  $\delta$  110.0;  $\delta$  65.2;  $\delta$  27.8;  $\delta$  21.5;  $\delta$  14.6. Calculated for ( $\text{C}_{13}\text{H}_{17}\text{O}_5^+$ )  $m/z$   $[\text{M}+\text{H}]^+ = 253.1076$ , found 253.1067.

Benzoic acid, 3,4,5-trimethoxy-methyl ester (**2l**): Yellow solid; Yield: 20%, m.p: 83 °C; IR (KBr,  $\text{cm}^{-1}$ ):  $\nu_{\text{Max}}$  3030, 2965, 1740, 1590, 1500, 1450, 1300, 1000;  $^1\text{H}$

NMR (CDCl<sub>3</sub>; 200 MHz): δ 7.29 (s, 2H), δ 3.90 (s, 12H); <sup>13</sup>C NMR (CDCl<sub>3</sub>, 50 MHz): δ 166.8, δ 153.0; δ 142.3, δ 125.2, δ 106.9, δ 61.0, δ 56.3, δ 52.3. Calculated for (C<sub>11</sub>H<sub>15</sub>O<sub>5</sub><sup>+</sup>) m/z [M+H]<sup>+</sup> = 227,0914 found, 227,0919.

4-hydroxy-3,5-dimethoxy-methyl ester (**2m**): Yellow solid; yield: 18%, m.p: 108 °C; IR (KBr, cm<sup>-1</sup>): ν<sub>Max</sub> 3490, 3000, 2960, 1700, 1580, 1500, 1450, 1200, 1050; <sup>1</sup>H NMR (CDCl<sub>3</sub>; 200 MHz): δ 7.21 (s, 2H), δ 3.96 (s, 6H); δ 3.87 (s, 3H); <sup>13</sup>C NMR (CDCl<sub>3</sub>, 50 MHz): δ 167.0, δ 148.9, δ 138.8, δ 125.9, δ 109.8, δ 61.1, δ 52.4. Calculated for (C<sub>10</sub>H<sub>13</sub>O<sub>5</sub><sup>+</sup>) m/z [M+H]<sup>+</sup> = 213,0763 found 213,0758.

## IR, NMR ( $^1\text{H}$ and $^{13}\text{C}$ ) and MS spectrum of target compounds

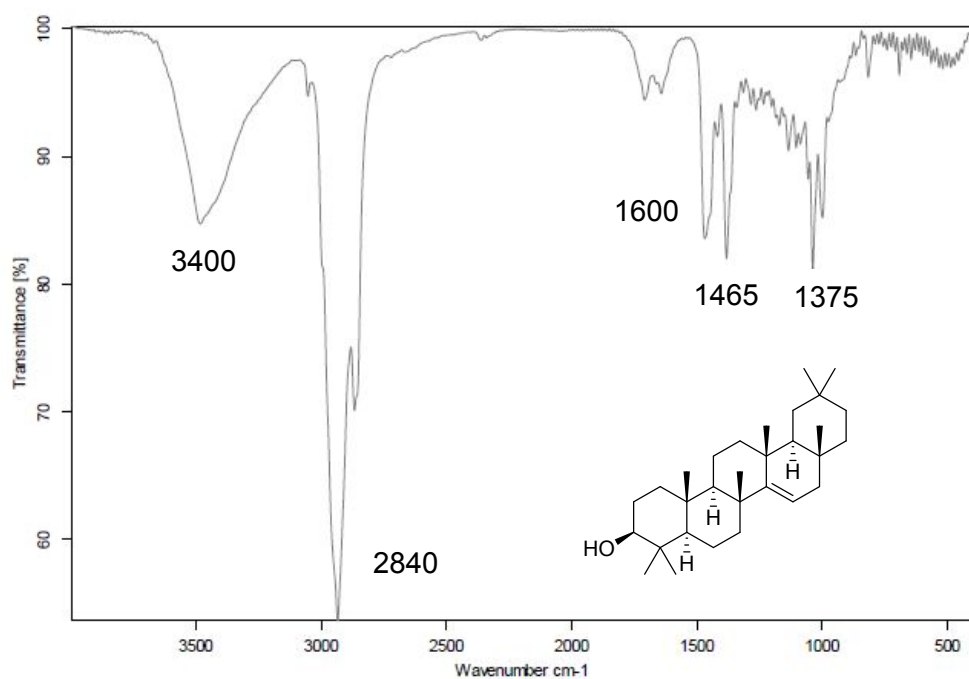

Figure S1: IR spectrum of the compound **Taraxerol**

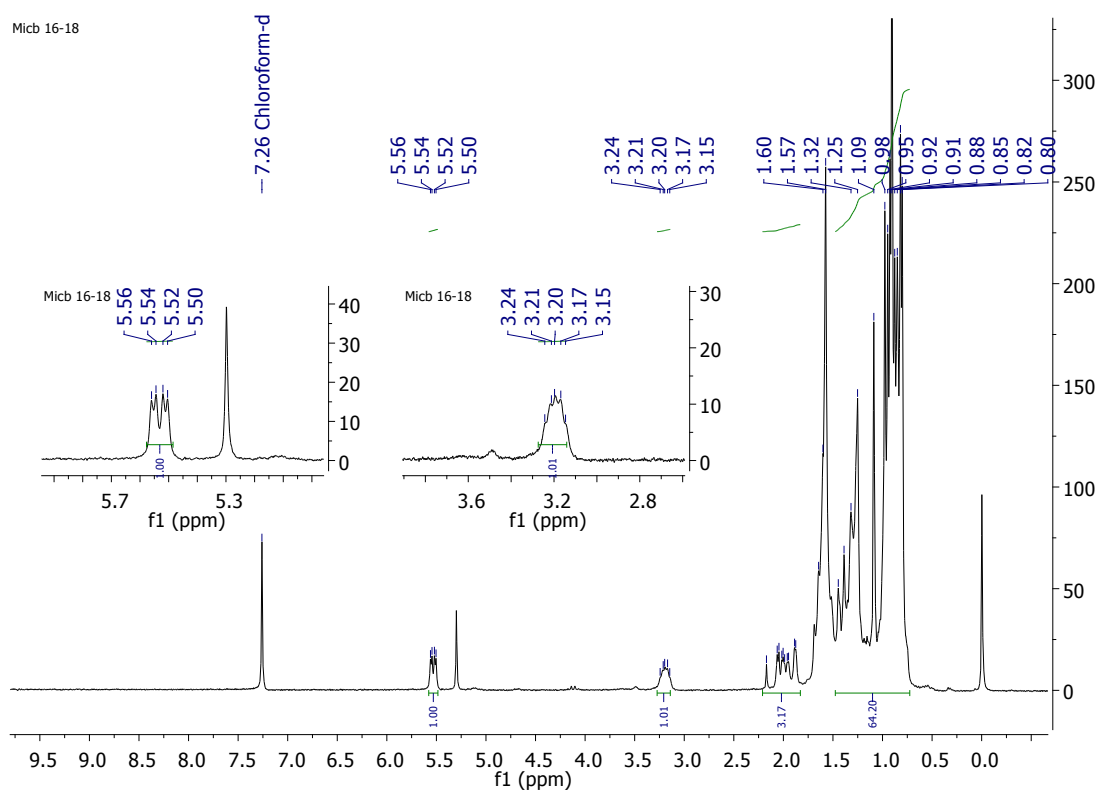

Figure S2:  $^1\text{H}$ -NMR (200 MHz,  $\text{CDCl}_3$ ) spectrum of the compound **Taraxerol**

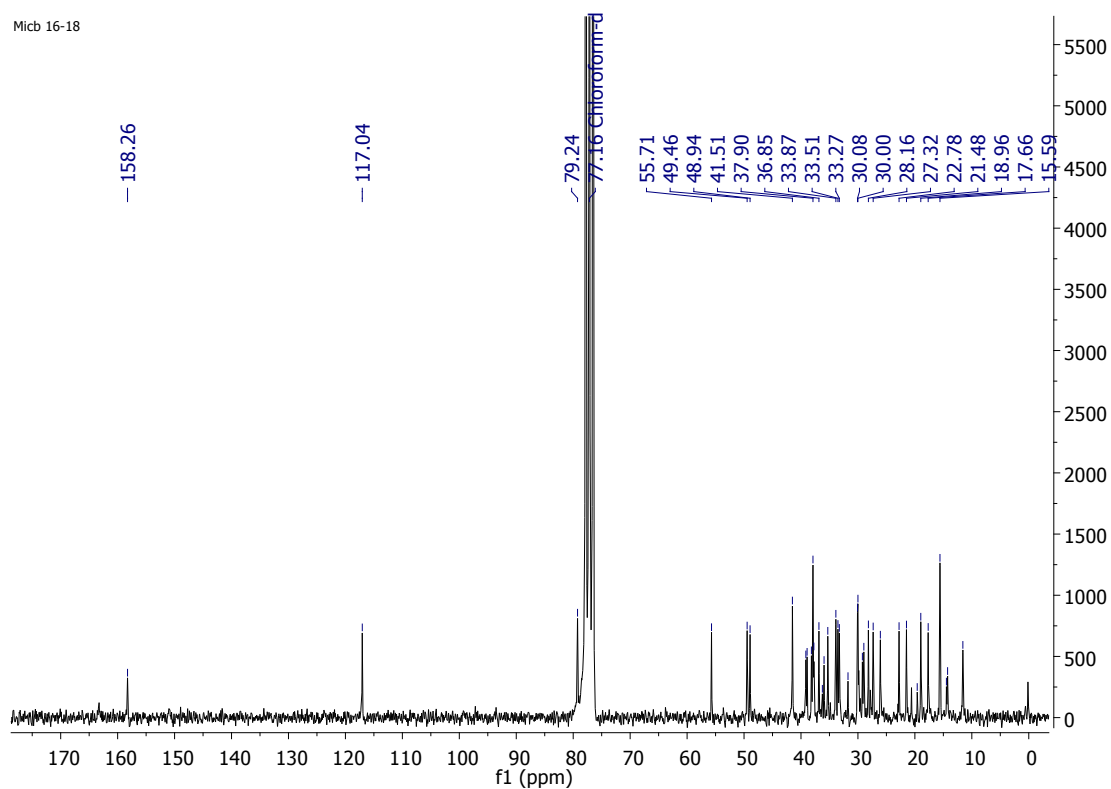

Figure S3: <sup>13</sup>C-NMR (50 MHz, CDCl<sub>3</sub>) spectrum of the compound **Taraxerol**

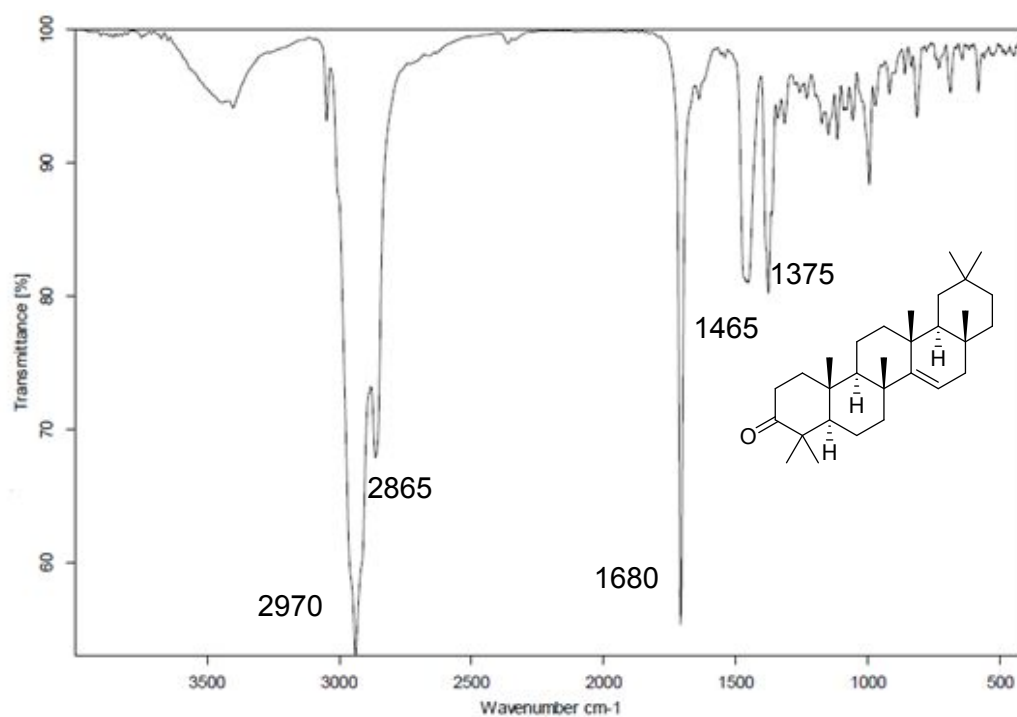

Figure S4: IR spectrum of the compound **Taraxerone**

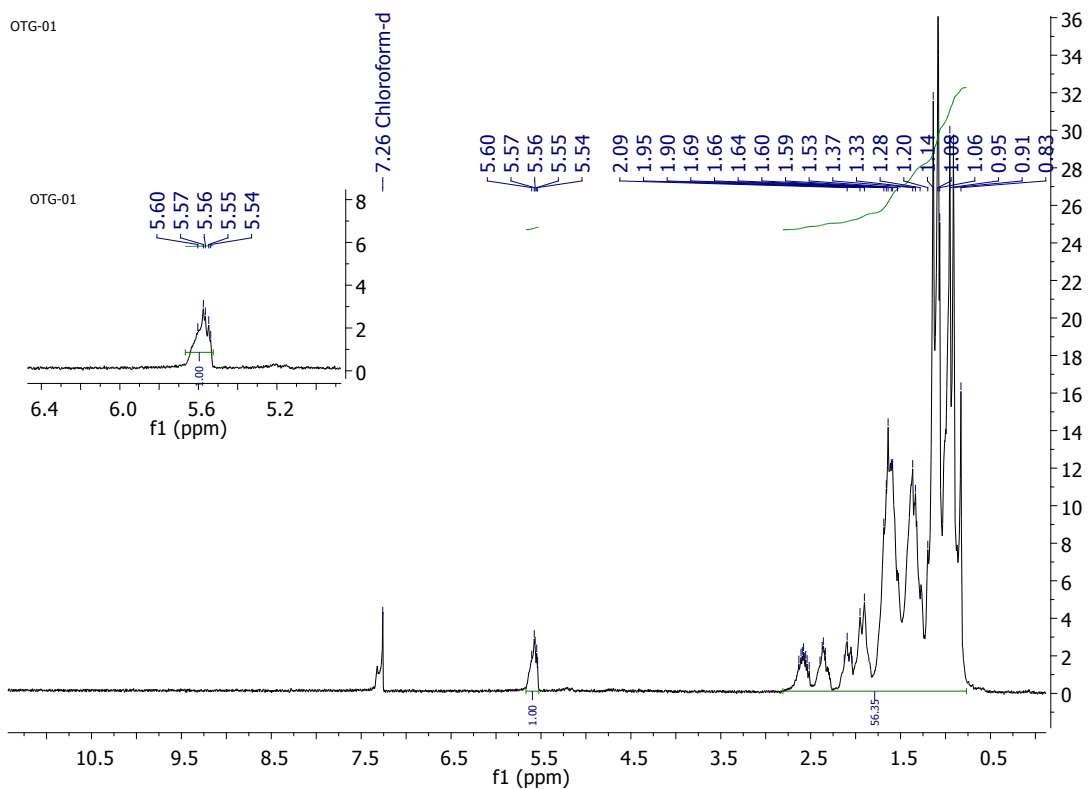

Figure S5:  $^1\text{H-NMR}$  (300 MHz,  $\text{CDCl}_3$ ) spectrum of the compound **Taraxerone**

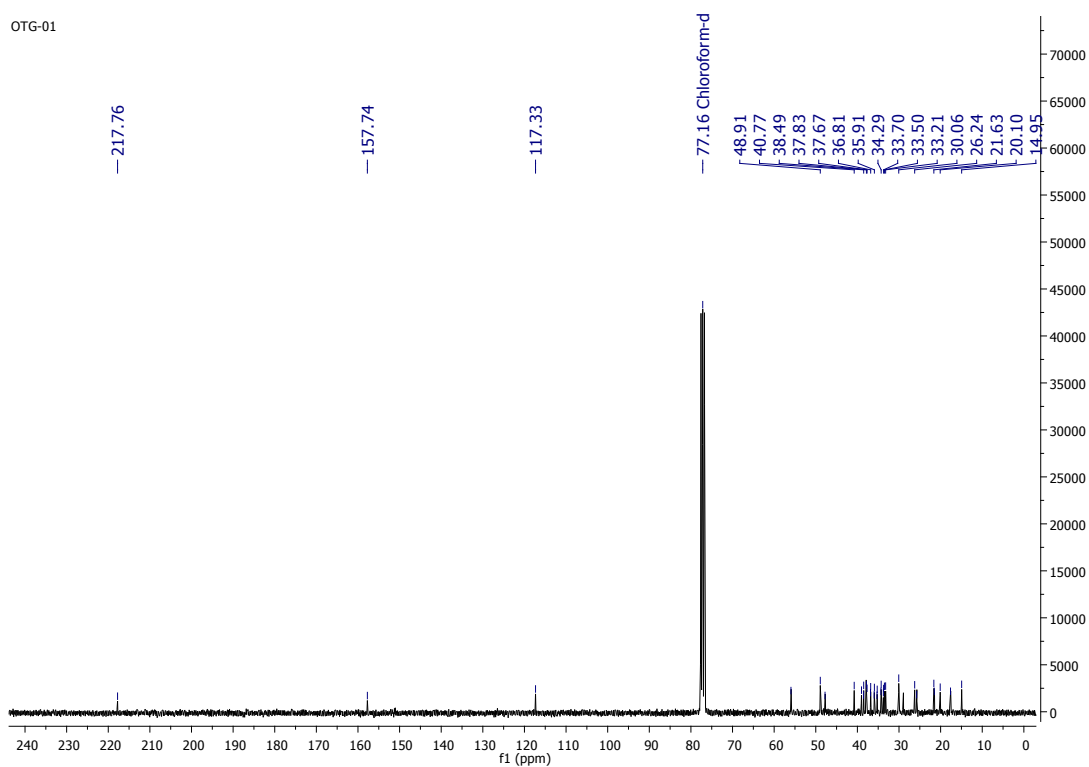

Figure S6:  $^{13}\text{C-NMR}$  (75 MHz,  $\text{CDCl}_3$ ) spectrum of the compound **Taraxerone**



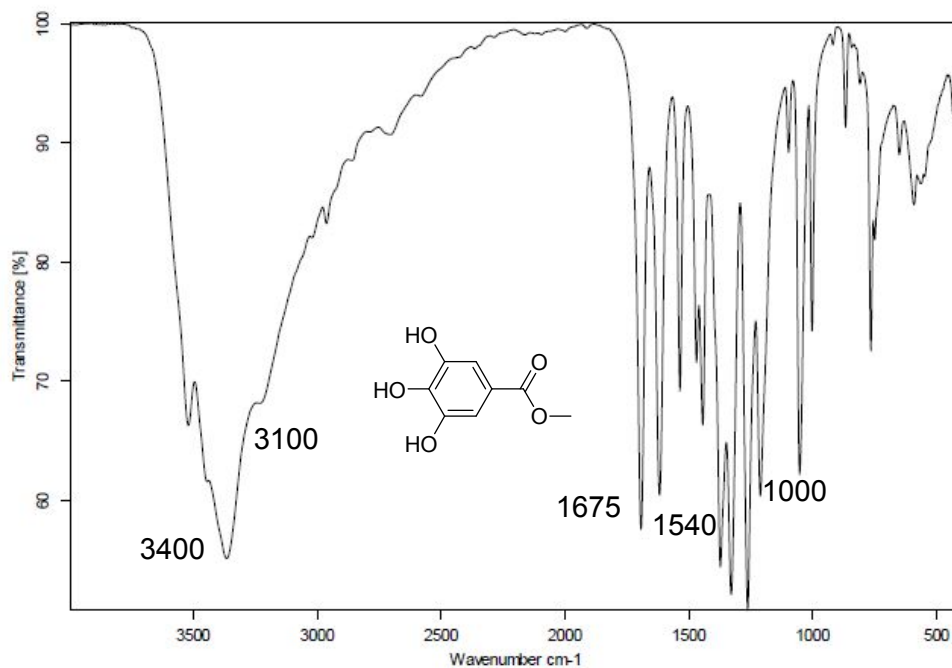

Figure S7: IR spectrum of the compound **Methyl Gallate**

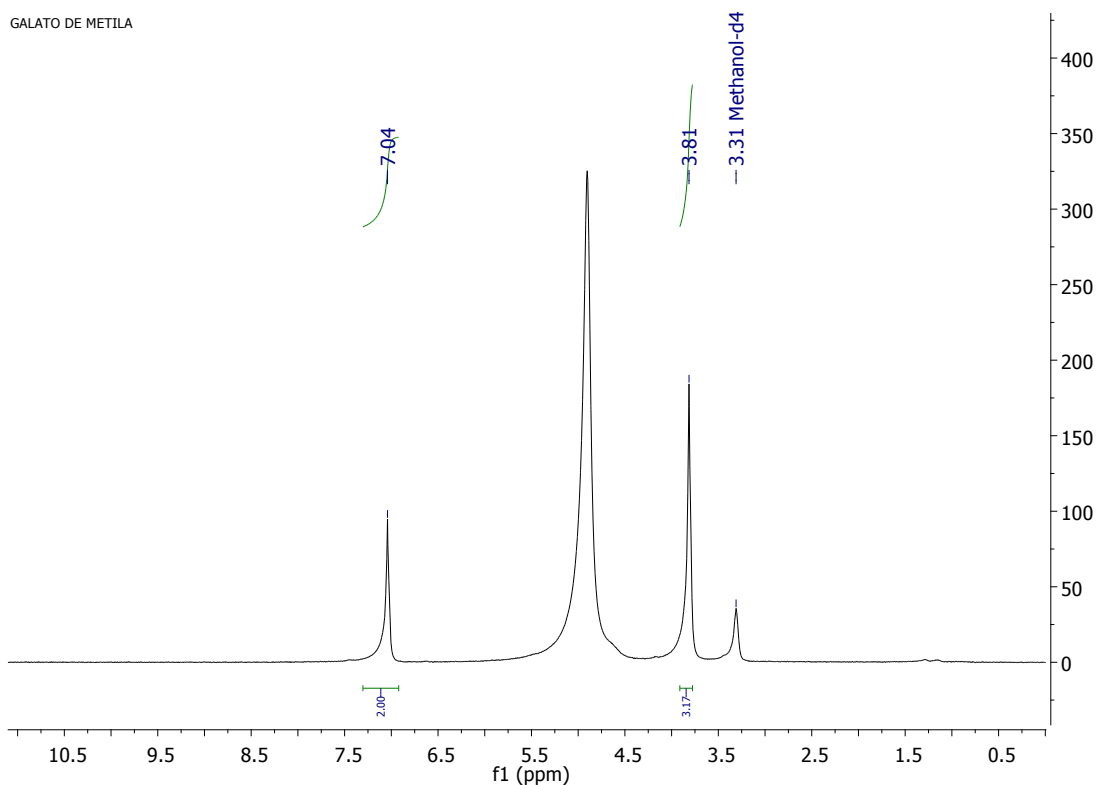

Figure S8: <sup>1</sup>H-NMR (200 MHz, CD<sub>3</sub>OD) spectrum of the compound **Methyl Gallate**

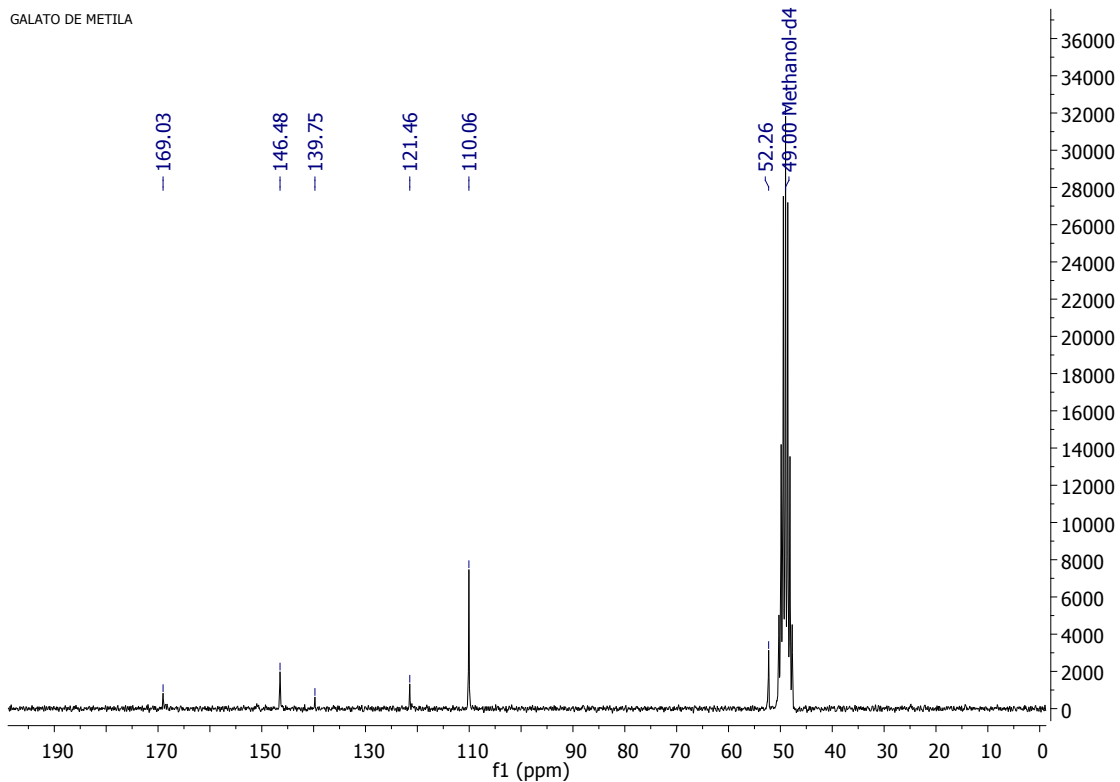

Figure S9:  $^{13}\text{C}$ -NMR (50 MHz,  $\text{CD}_3\text{OD}$ ) spectrum of the compound **Methyl Gallate**

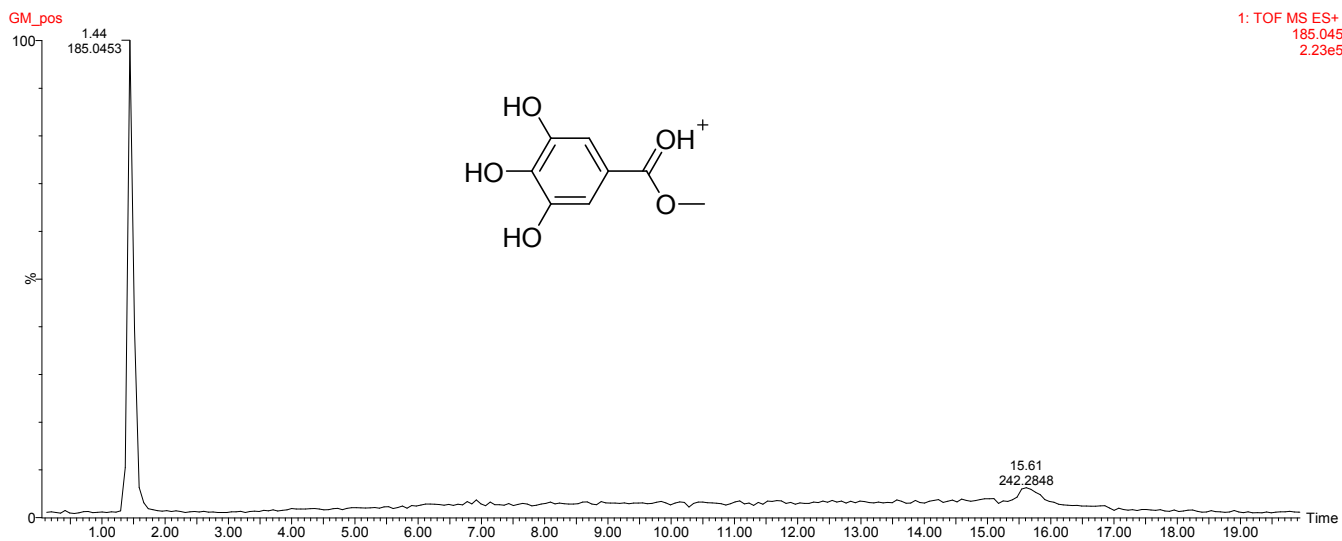

Figure S10: UPLC-ESI-MS of the compound **Methyl Gallate**

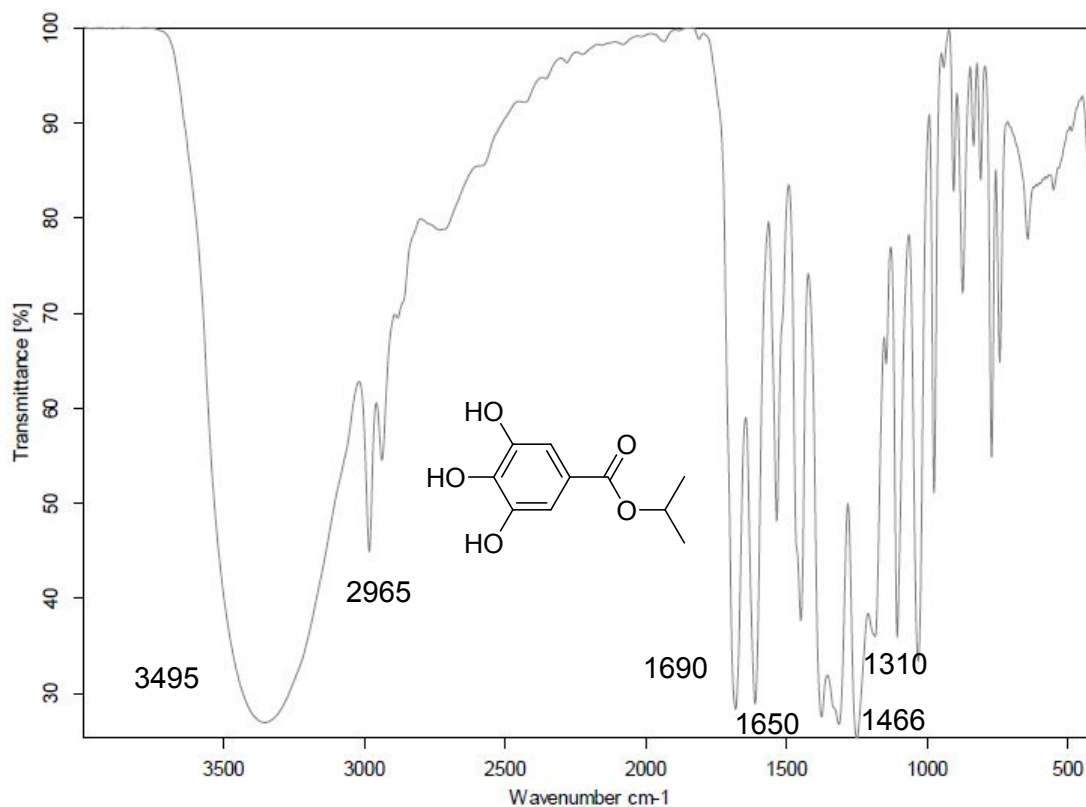

Figure S11: IR spectrum of the compound **Isopropyl Gallate**

rielaS\_EAG-DMAP.174-196\_CD30

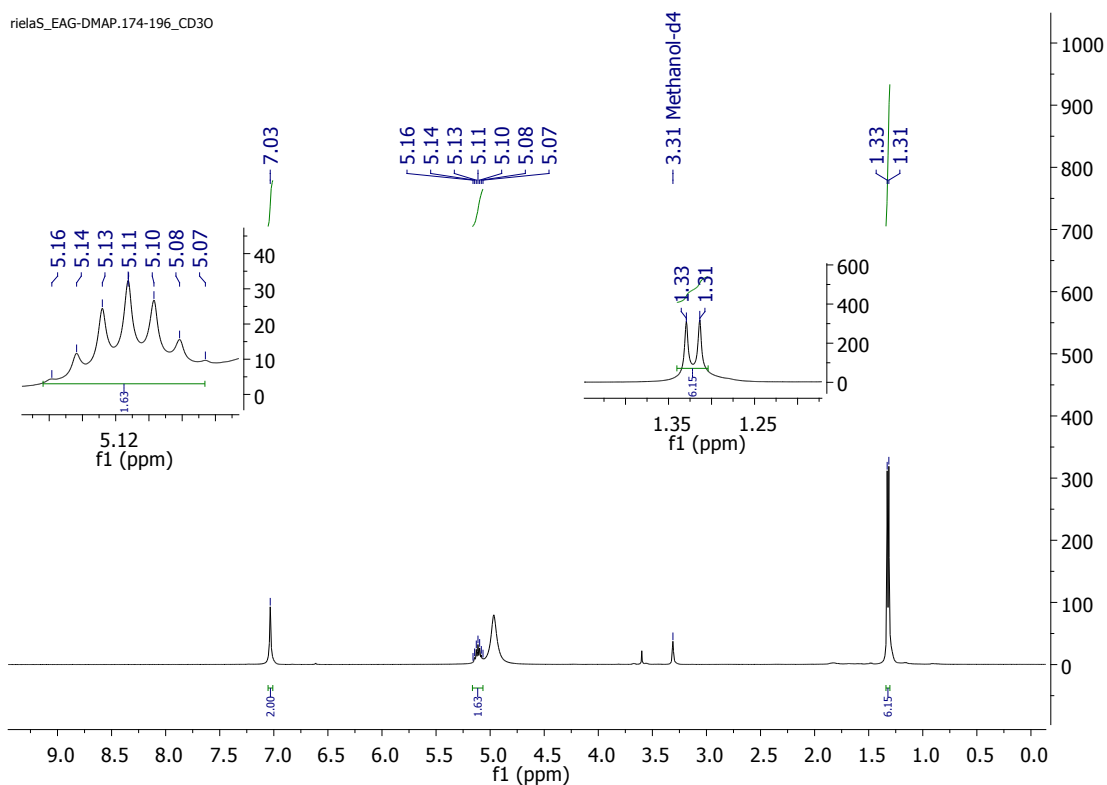

Figure S12: <sup>1</sup>H-NMR (400 MHz, CD<sub>3</sub>OD) spectrum of the compound **Isopropyl Gallate**

rielaS\_EAG-DMAP.174-196\_CD3O

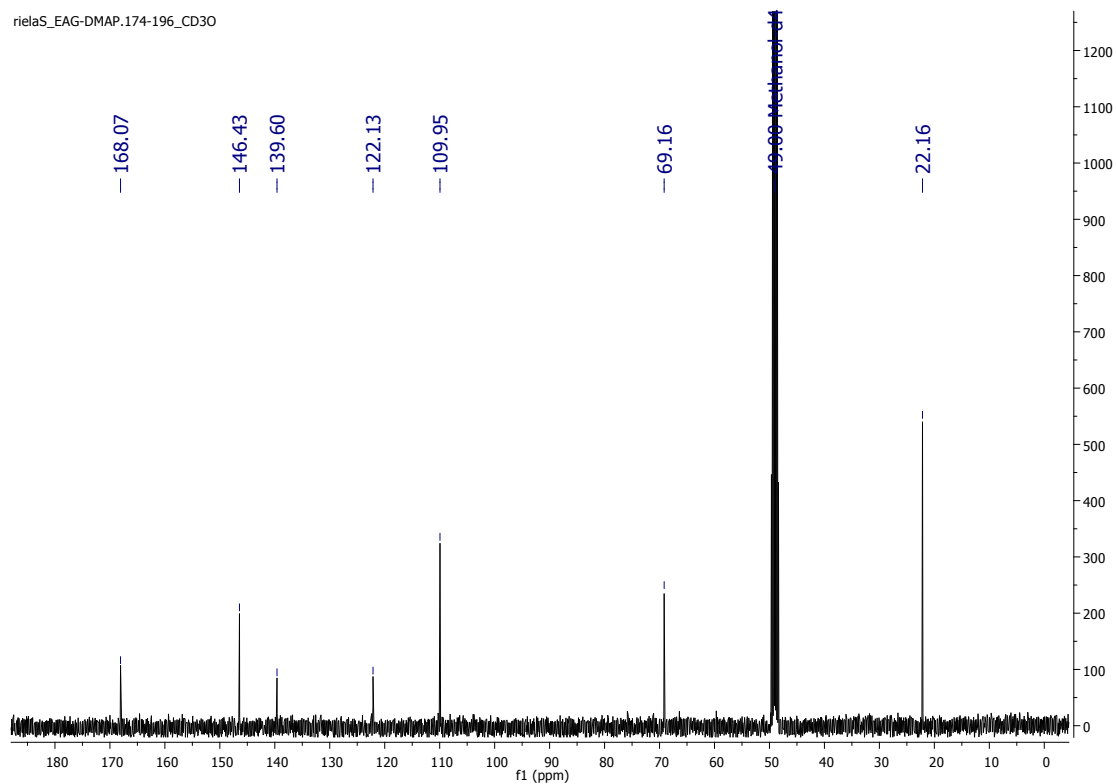

Figure S13: <sup>13</sup>C-NMR (100 MHz, CD<sub>3</sub>OD) spectrum of the compound **Isopropyl Gallate**

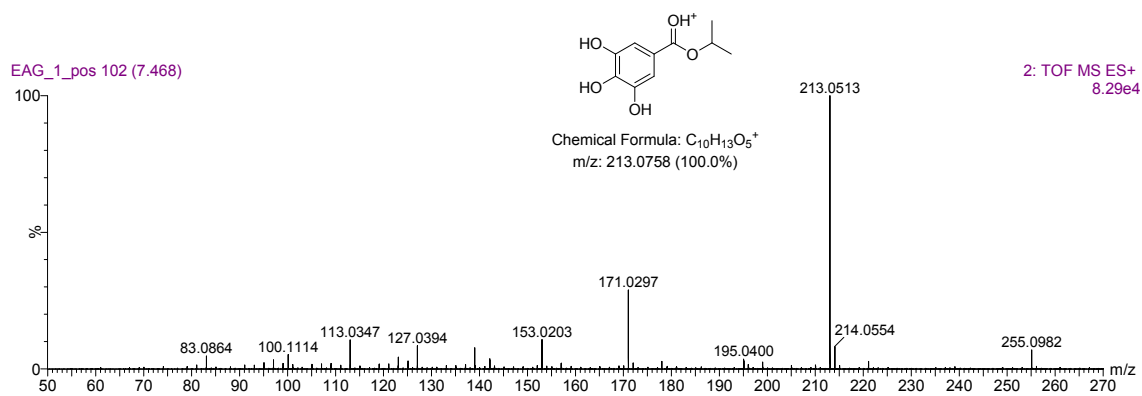

Figure S14: UPLC-ESI-MS of the compound **Isopropyl Gallate**

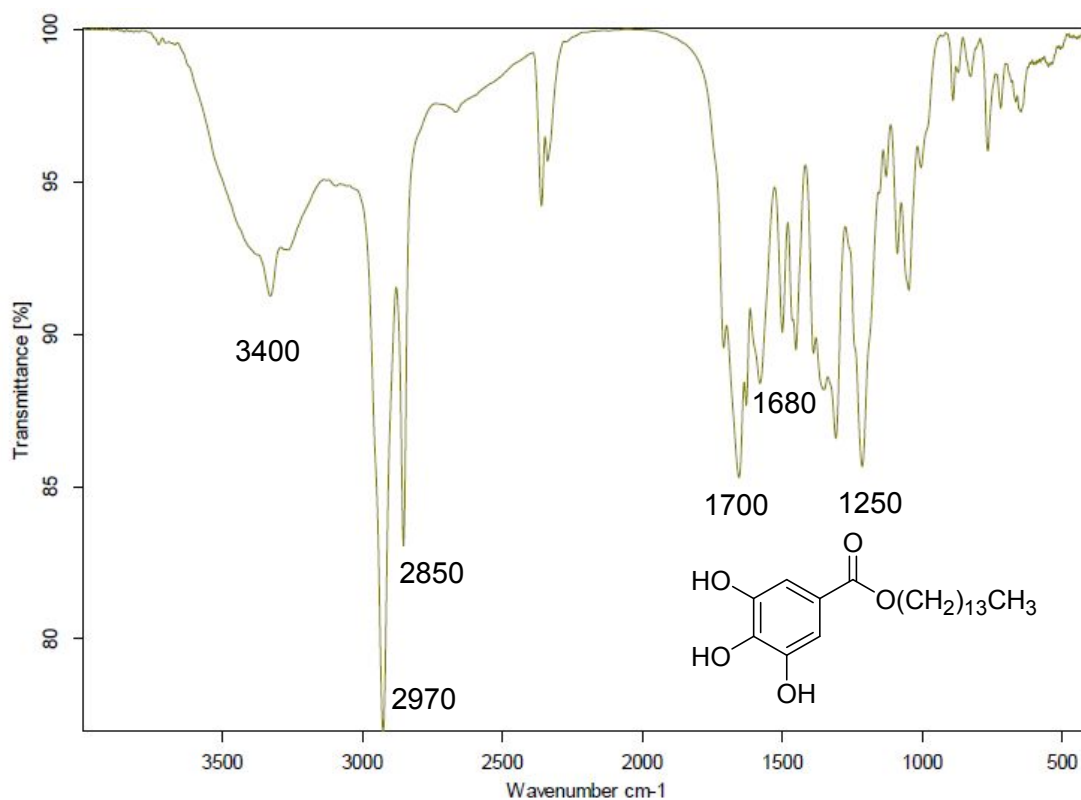

Figure S15: IR spectrum of the compound **Tetradecyl Gallate**

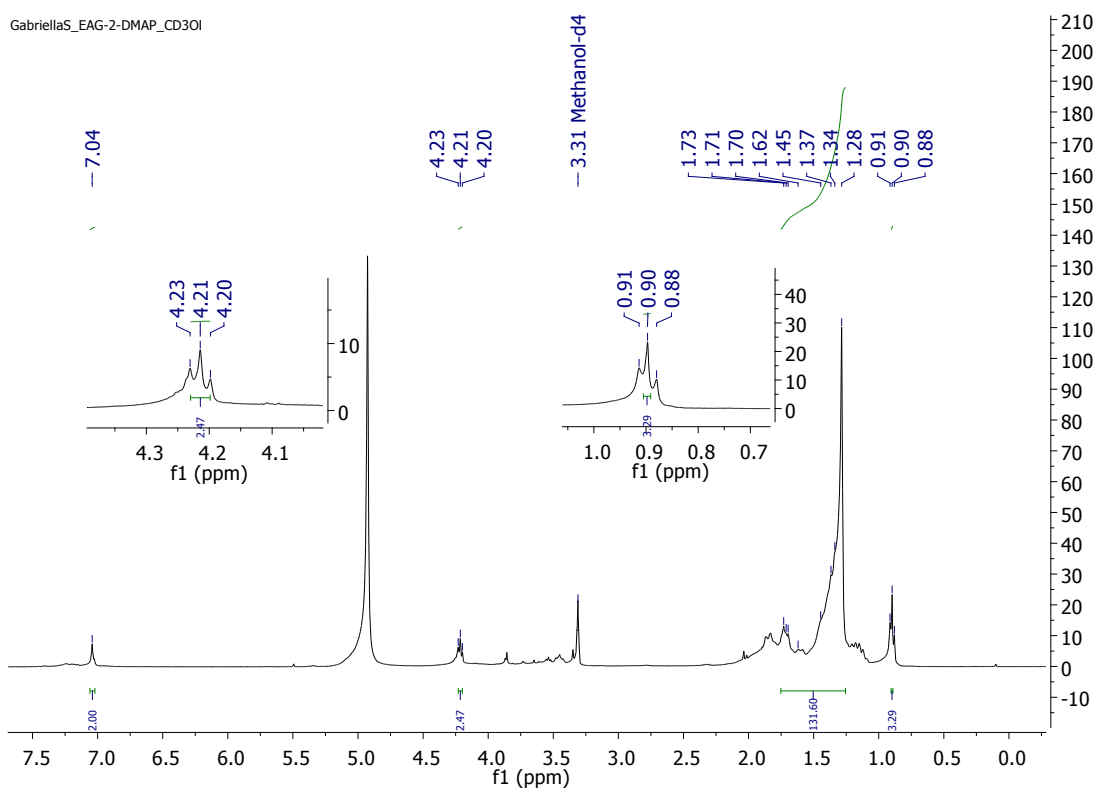

Figure S16:  $^1\text{H-NMR}$  (400 MHz,  $\text{CD}_3\text{OD}$ ) spectrum of the compound **Tetradecyl Gallate**

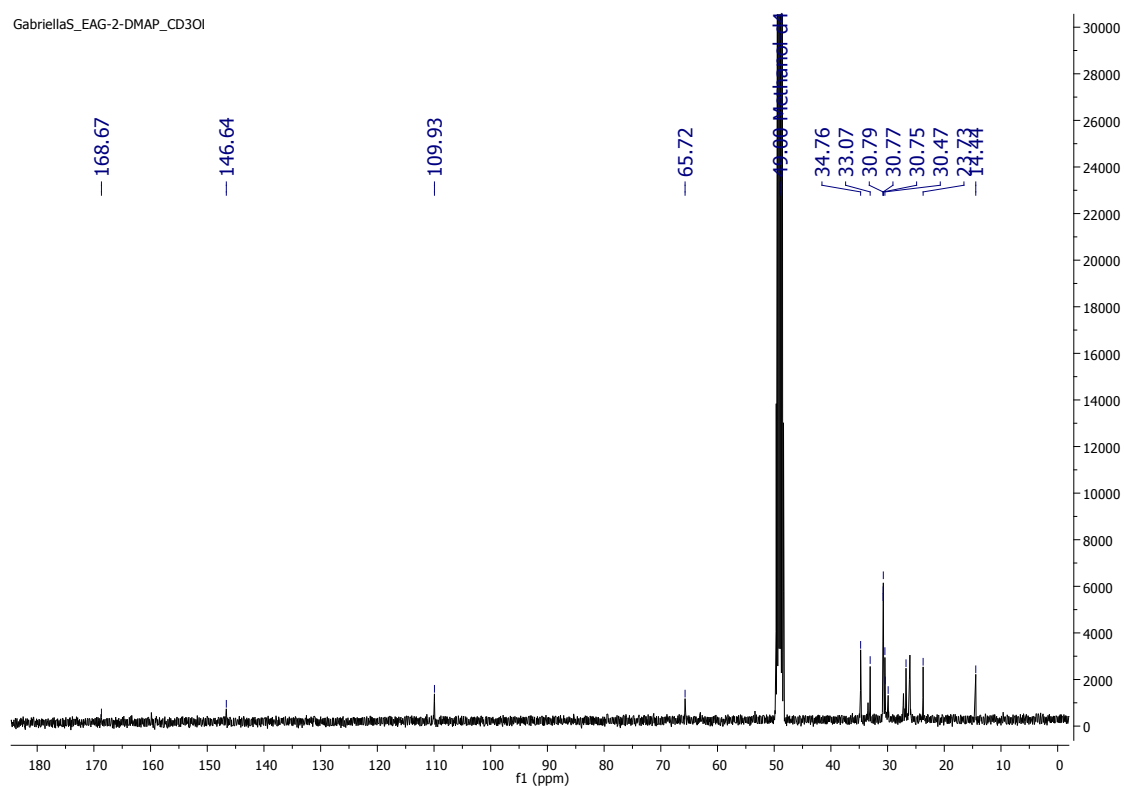

Figure S17:  $^{13}\text{C}$ -NMR (100 MHz,  $\text{CD}_3\text{OD}$ ) spectrum of the compound **Tetracycl Gallate**

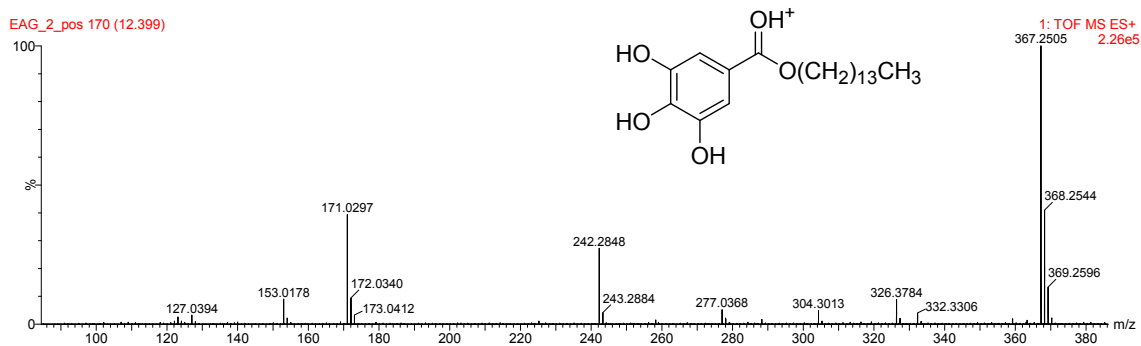

Figure S18: UPLC-ESI-MS of the compound **Tetracycl Gallate**

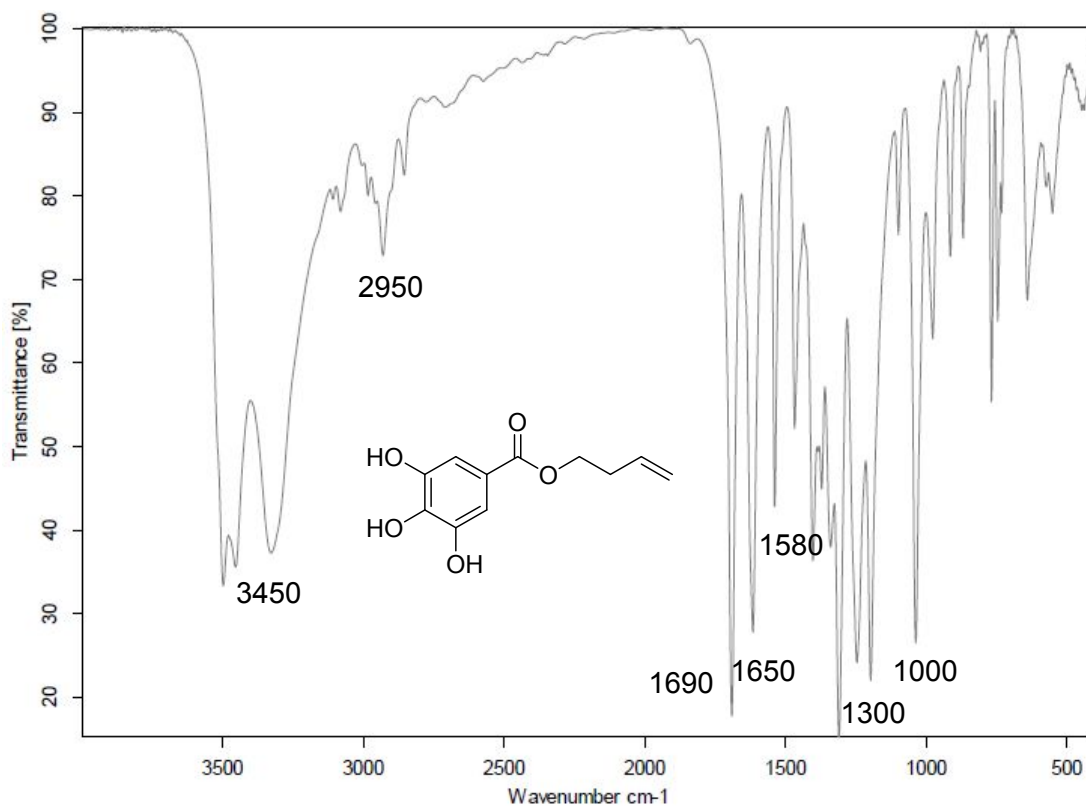

Figure S19: IR spectrum of the compound **But-3-enyl Gallate**

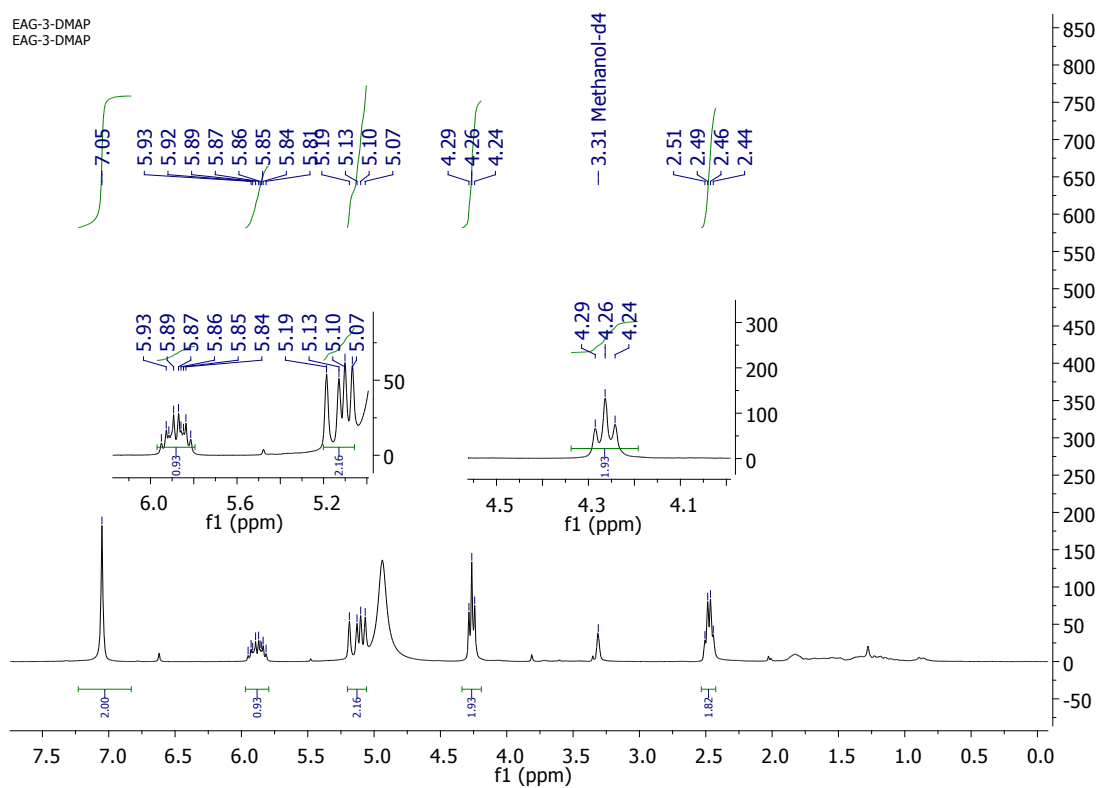

Figure S20: <sup>1</sup>H-NMR (300 MHz, CD<sub>3</sub>OD) spectrum of the compound **But-3-enyl Gallate**

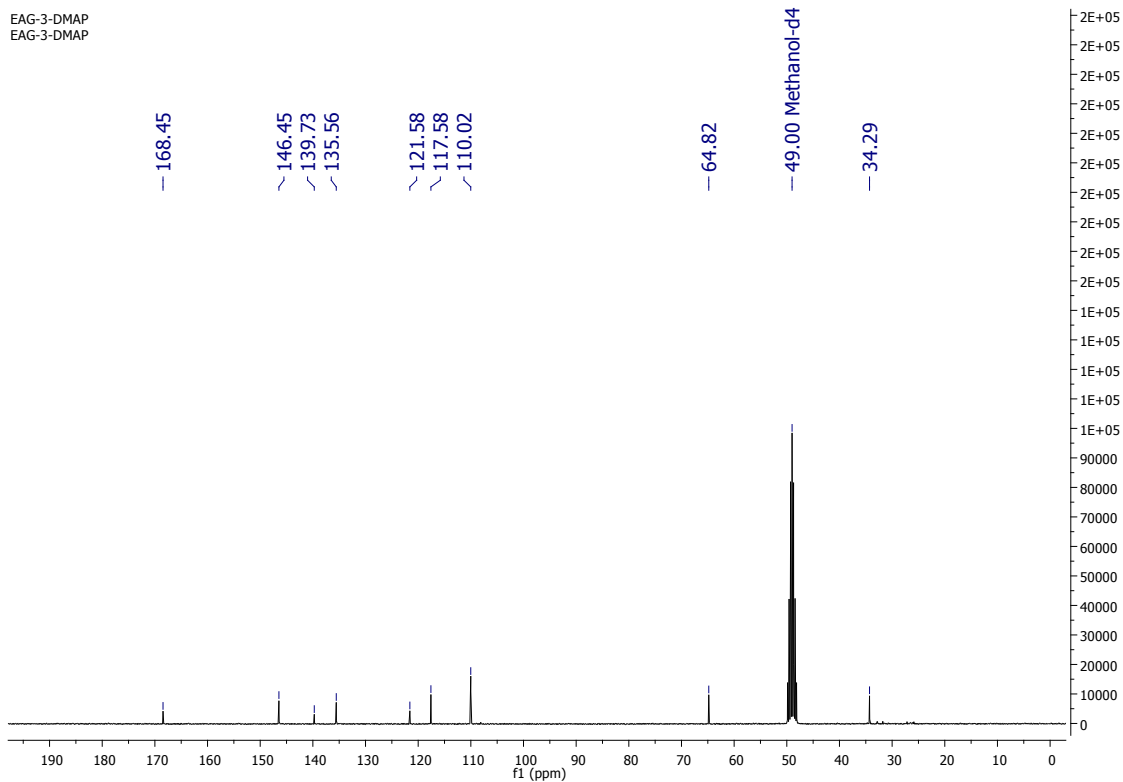

Figure S21:  $^{13}\text{C}$ -NMR (75 MHz,  $\text{CD}_3\text{OD}$ ) spectrum of the compound **But-3-enyl Gallate**

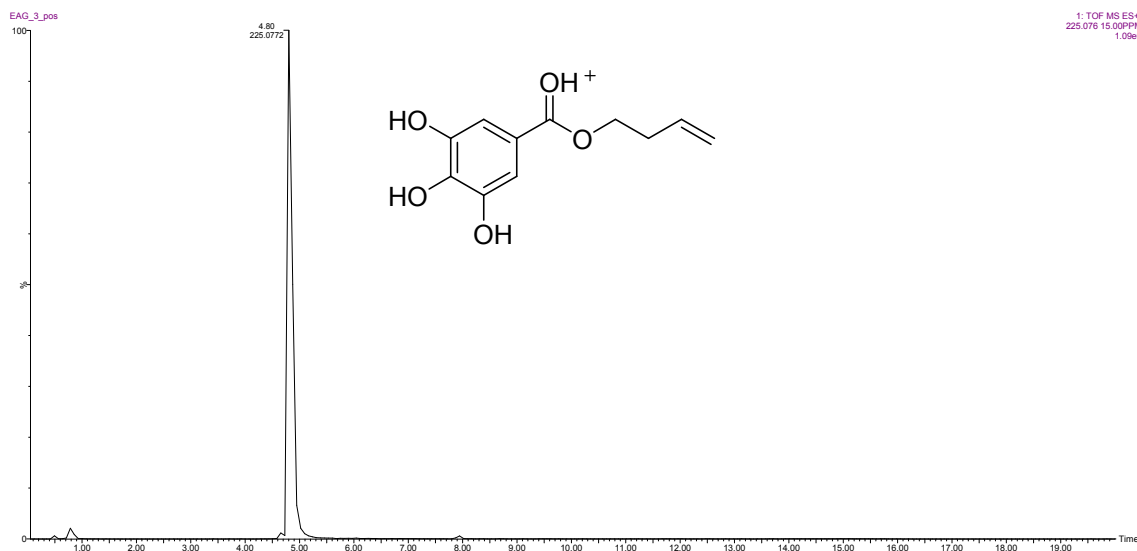

Figure S22: UPLC-ESI-MS of the compound **But-3-enyl Gallate**



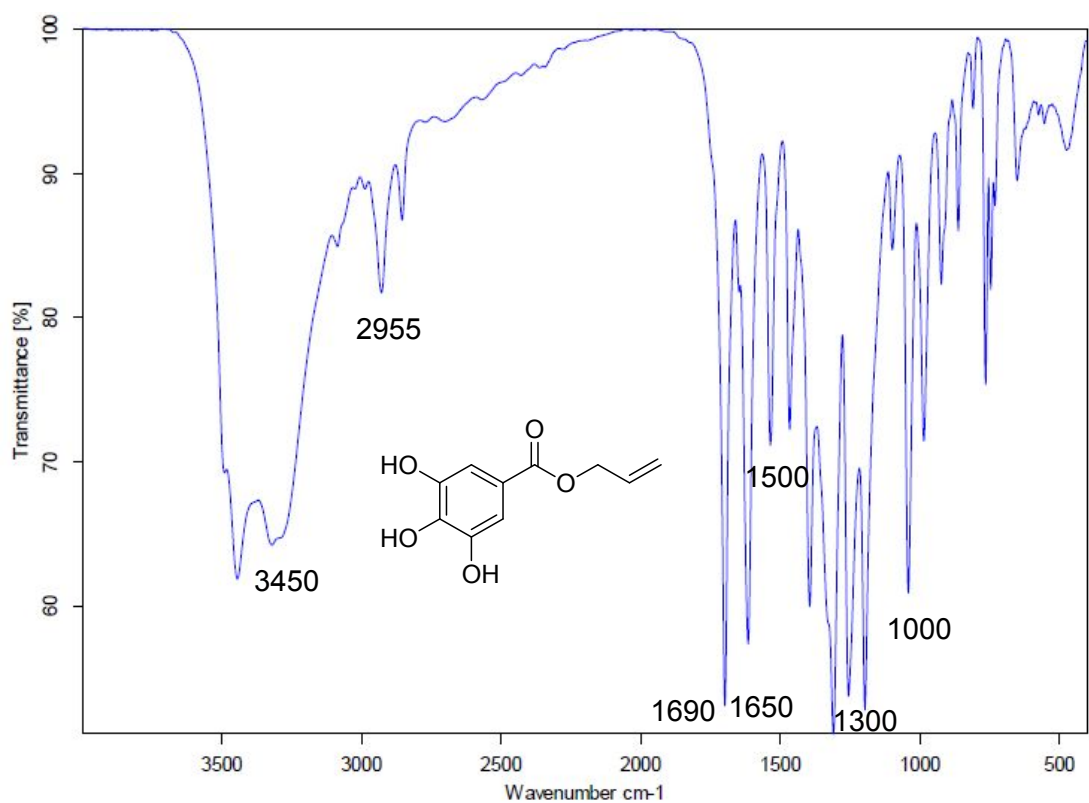

Figure S23: IR spectrum of the compound **Allyl Gallate**

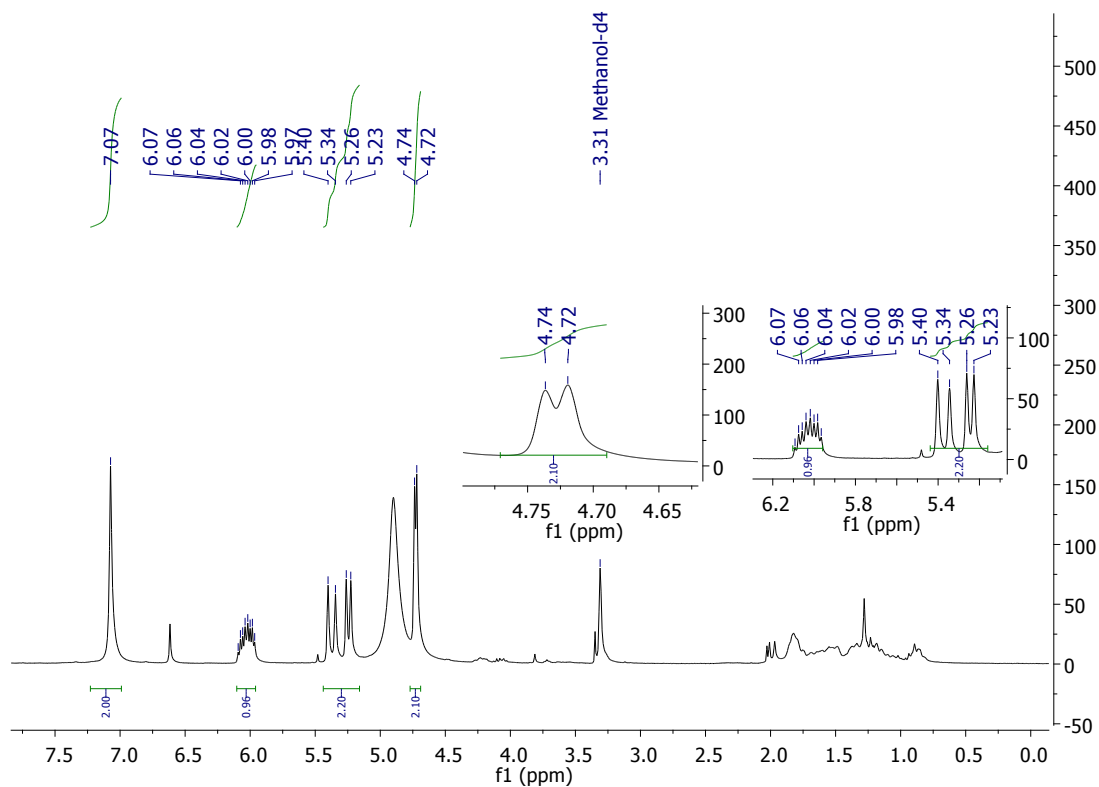

Figure S24: <sup>1</sup>H-NMR (300 MHz, CD<sub>3</sub>OD) spectrum of the compound **Allyl Gallate**

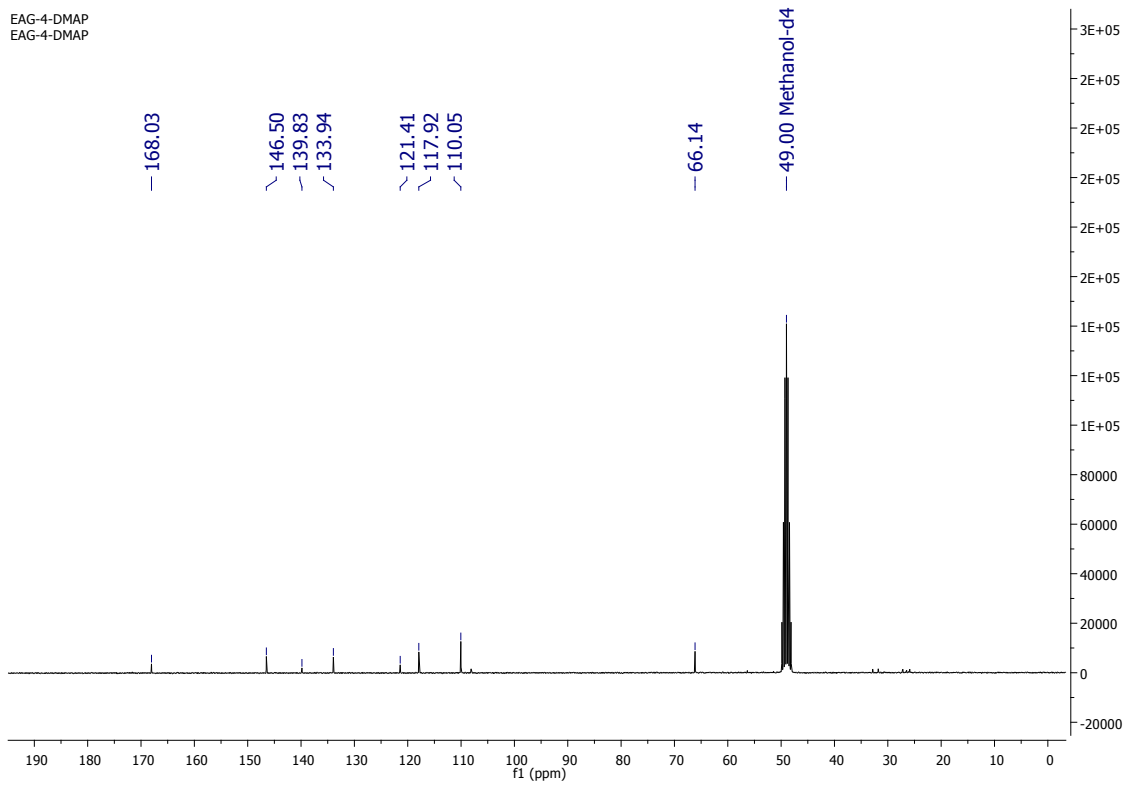

Figure S25:  $^{13}\text{C}$ -NMR (75 MHz,  $\text{CD}_3\text{OD}$ ) spectrum of the compound **Allyl Gallate**

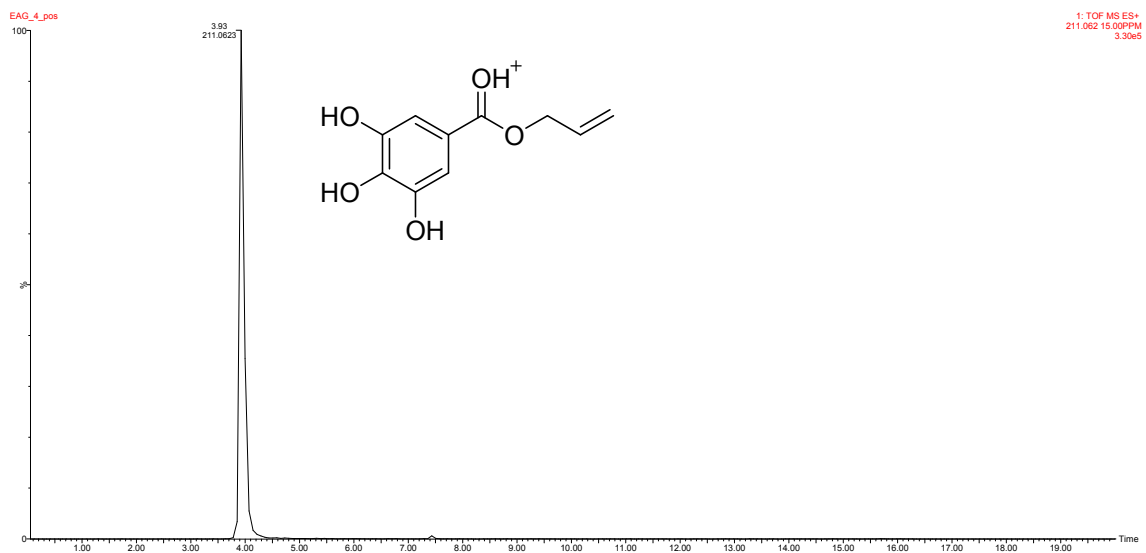

Figure S26: UPLC-ESI-MS of the compound **Allyl Gallate**

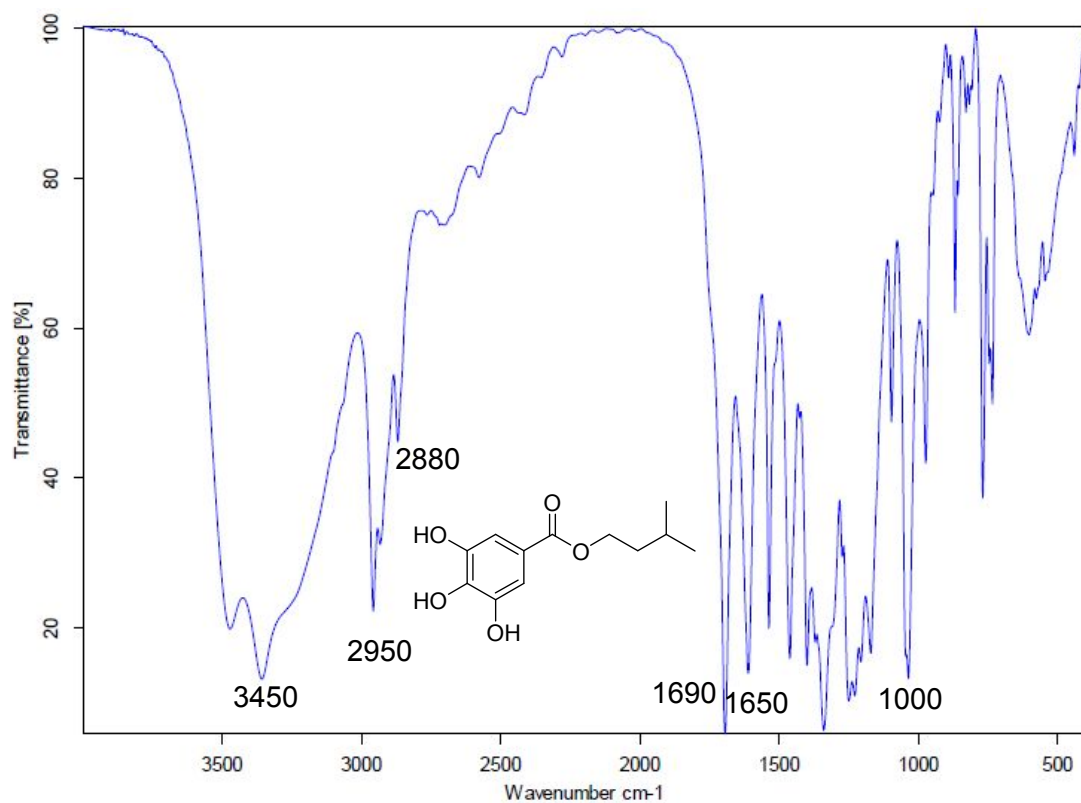

Figure S27: IR spectrum of the compound **Isoamyl Gallate**

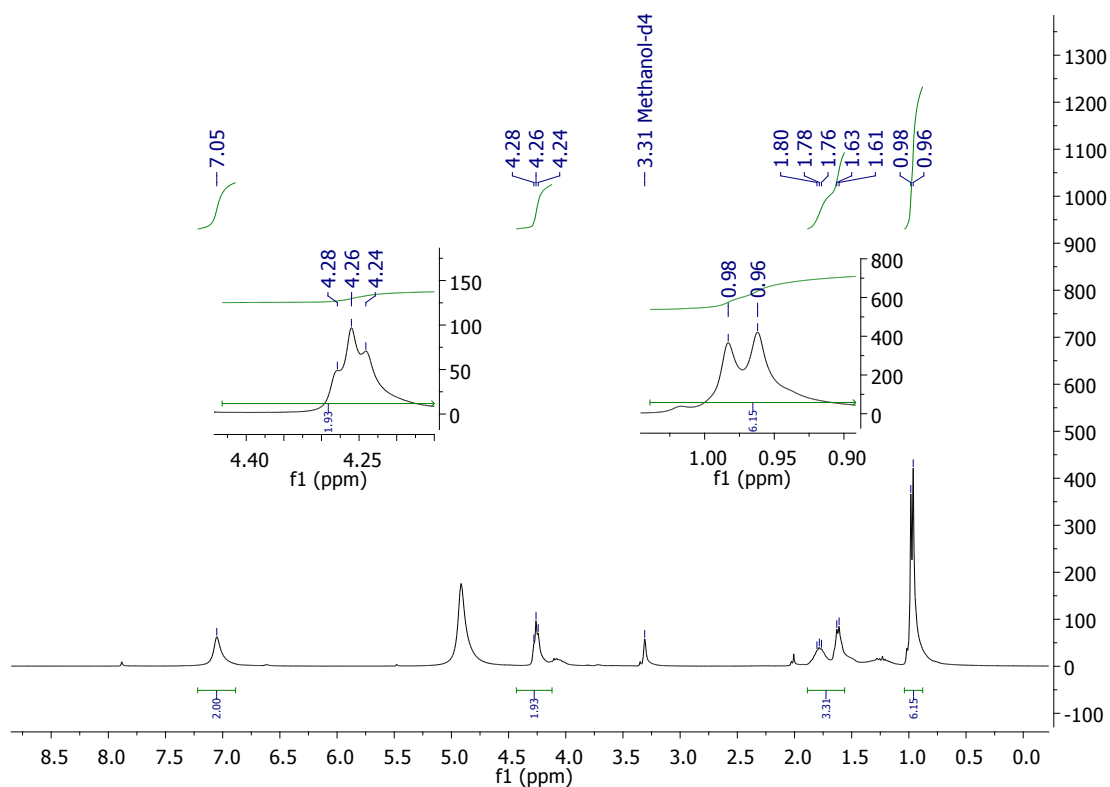

Figure S28: <sup>1</sup>H-NMR (300 MHz, CD<sub>3</sub>OD) spectrum of the compound **Isoamyl Gallate**

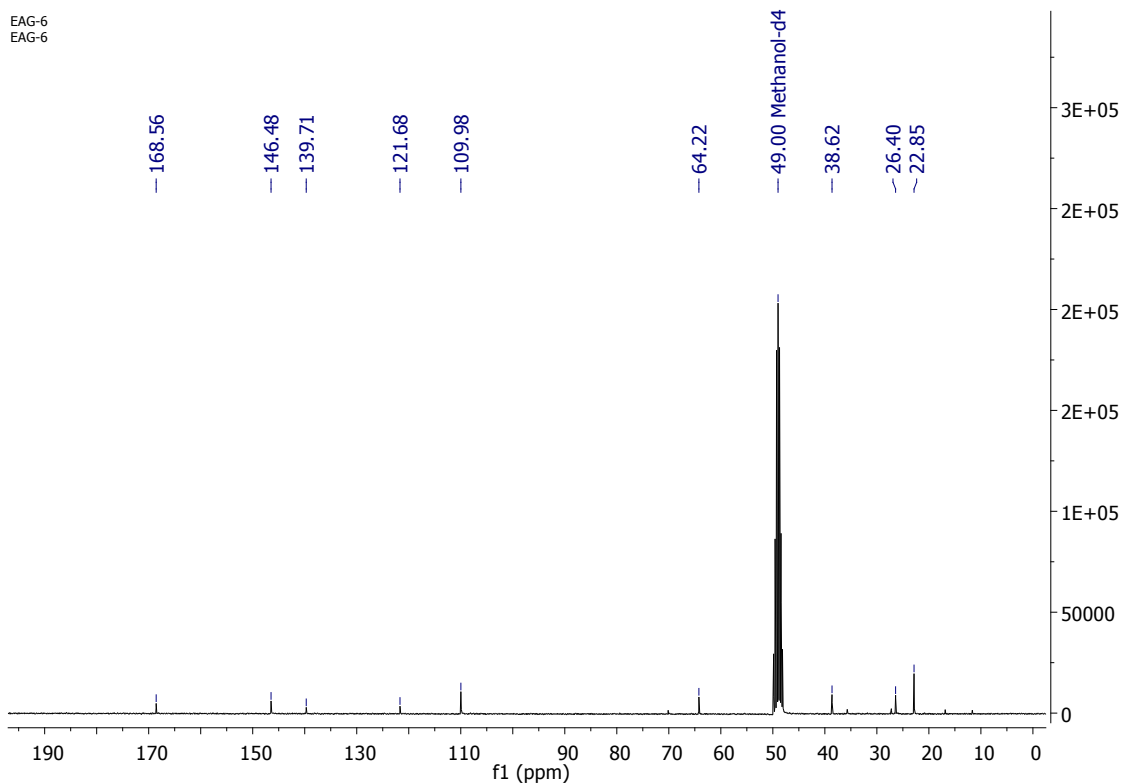

Figure S29:  $^{13}\text{C}$ -NMR (75 MHz,  $\text{CD}_3\text{OD}$ ) spectrum of the compound **Isoamyl Gallate**

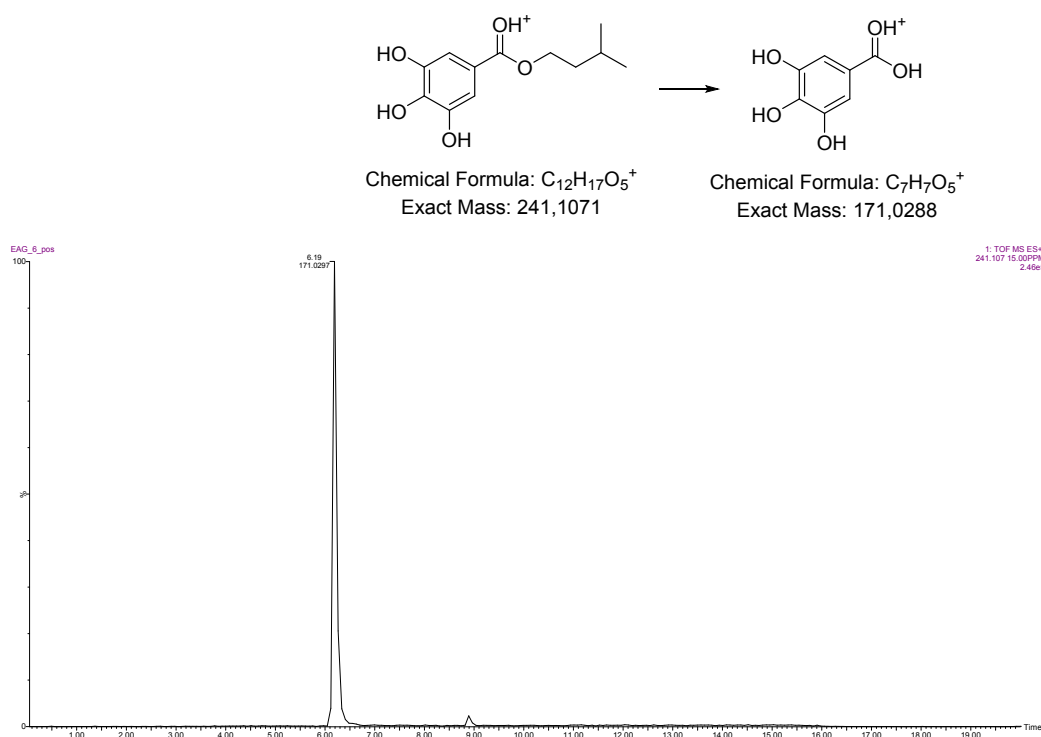

Figure S30: UPLC-ESI-MS of the compound **Isoamyl Gallate**

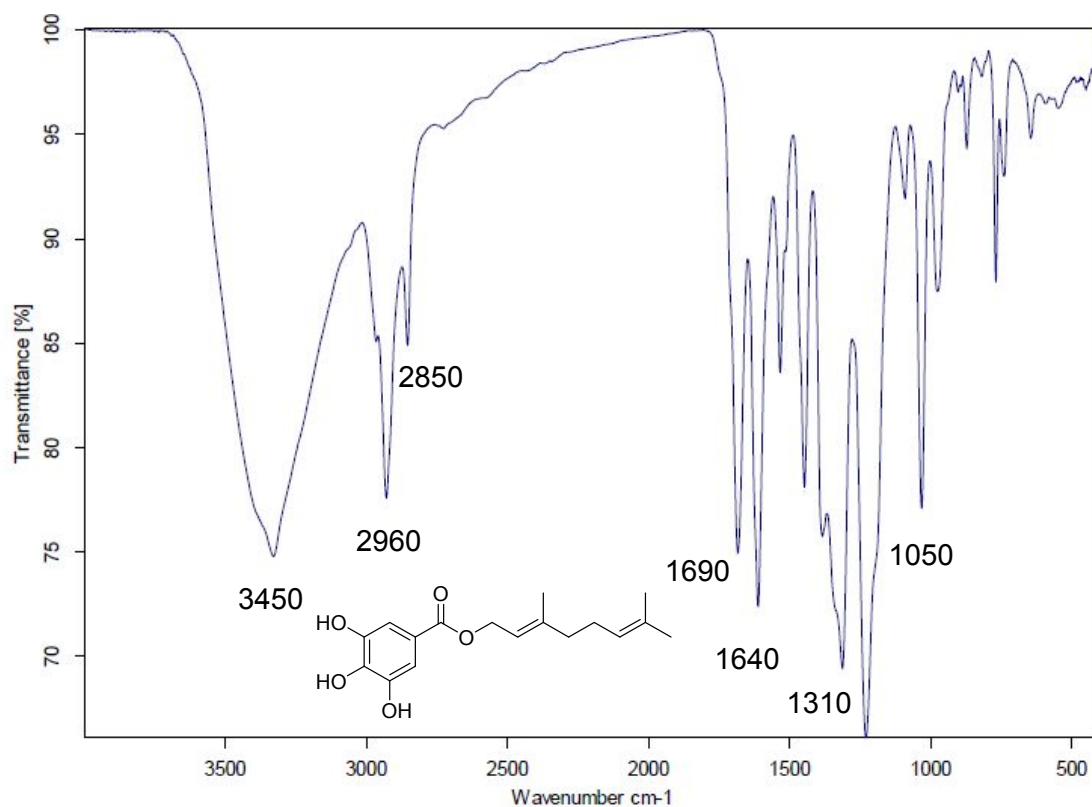

Figure S31: IR spectrum of the compound **Geranyl Gallate**

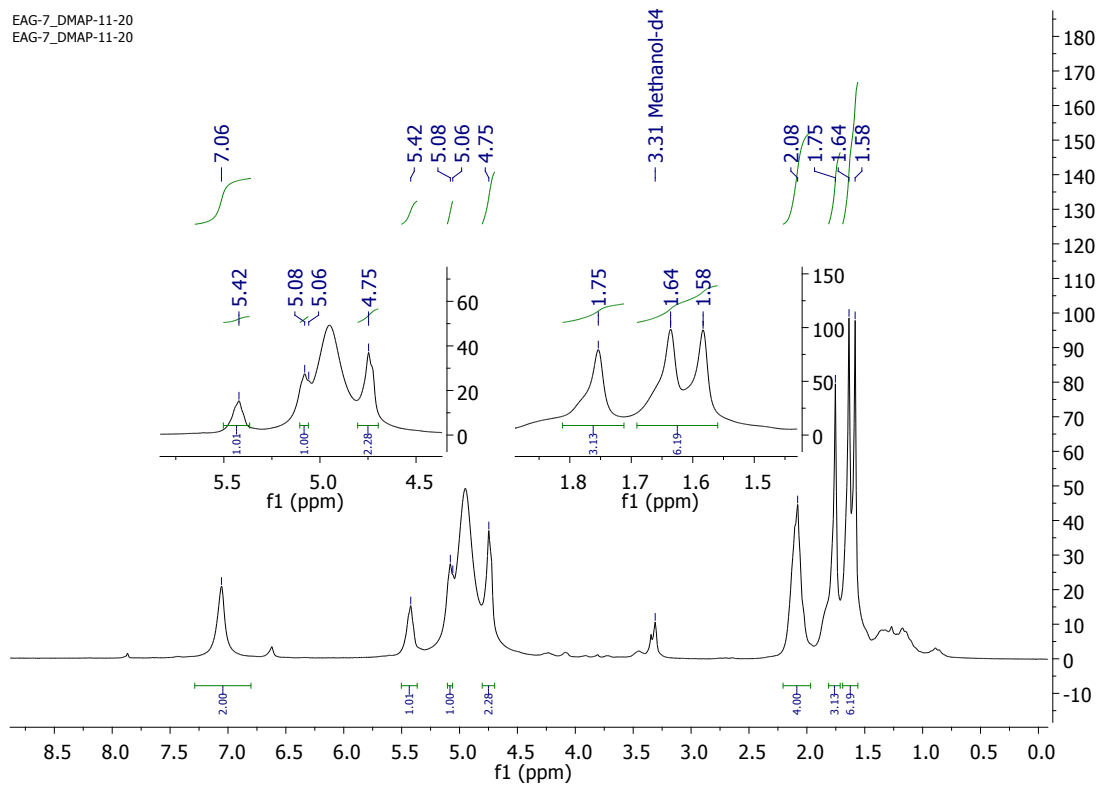

Figure S32: <sup>1</sup>H-NMR (300 MHz, CD<sub>3</sub>OD) spectrum of the compound **Geranyl Gallate**

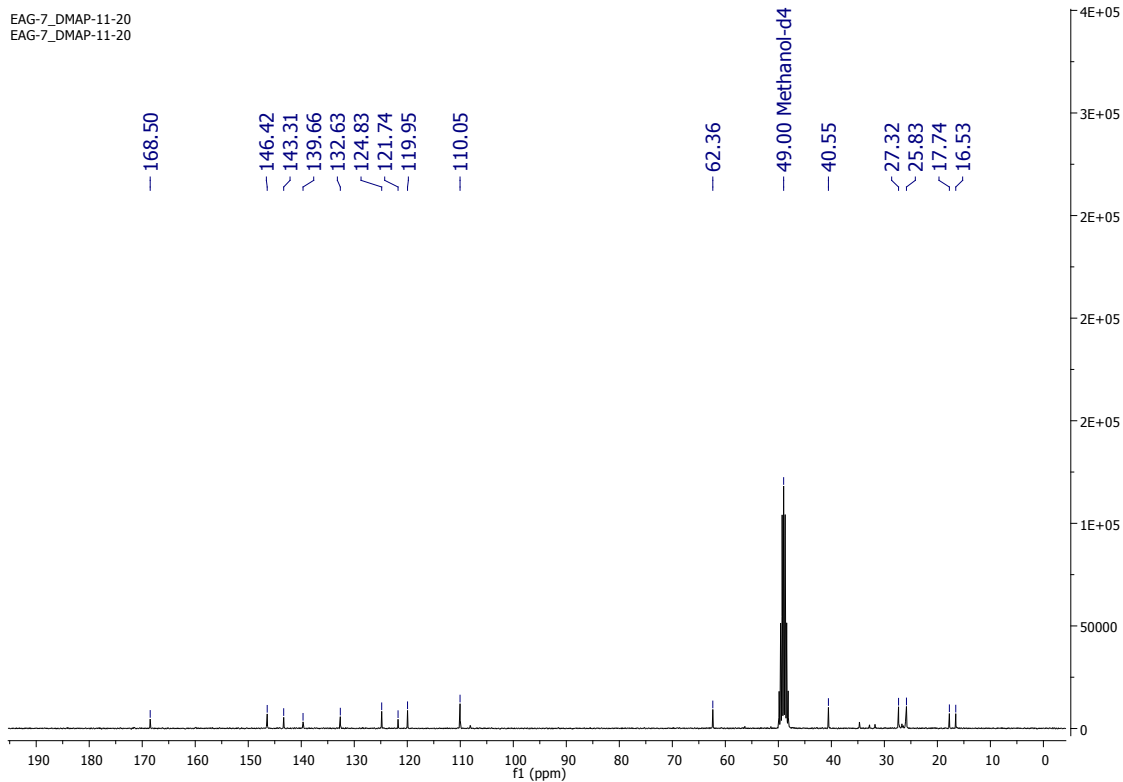

Figure S33:  $^{13}\text{C}$ -NMR (75 MHz,  $\text{CD}_3\text{OD}$ ) spectrum of the compound **Geranyl Gallate**

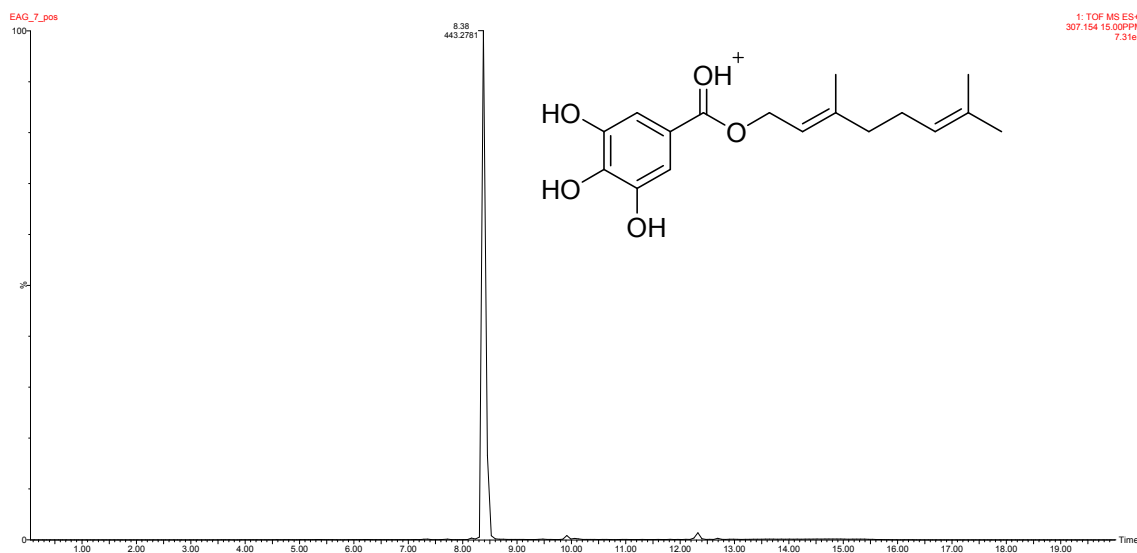

Figure S34: UPLC-ESI-MS of the compound **Geranyl Gallate**

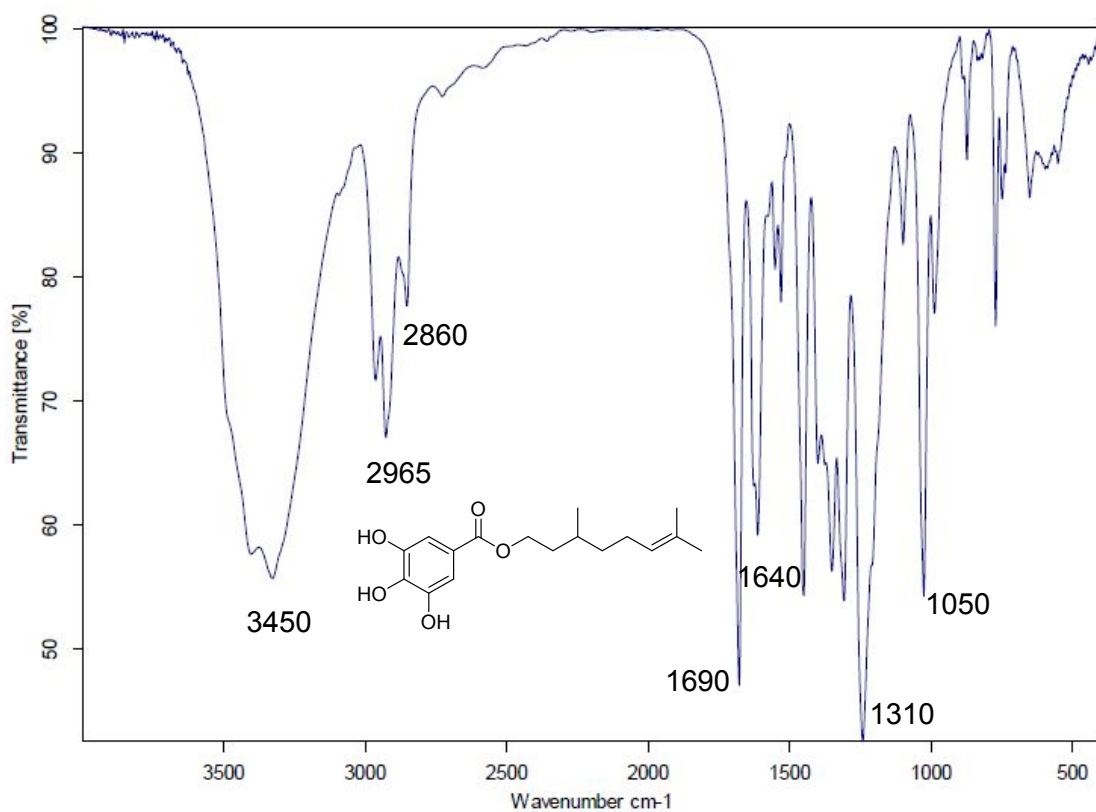

Figure S35: IR spectrum of the compound **Citronellyl gallate**

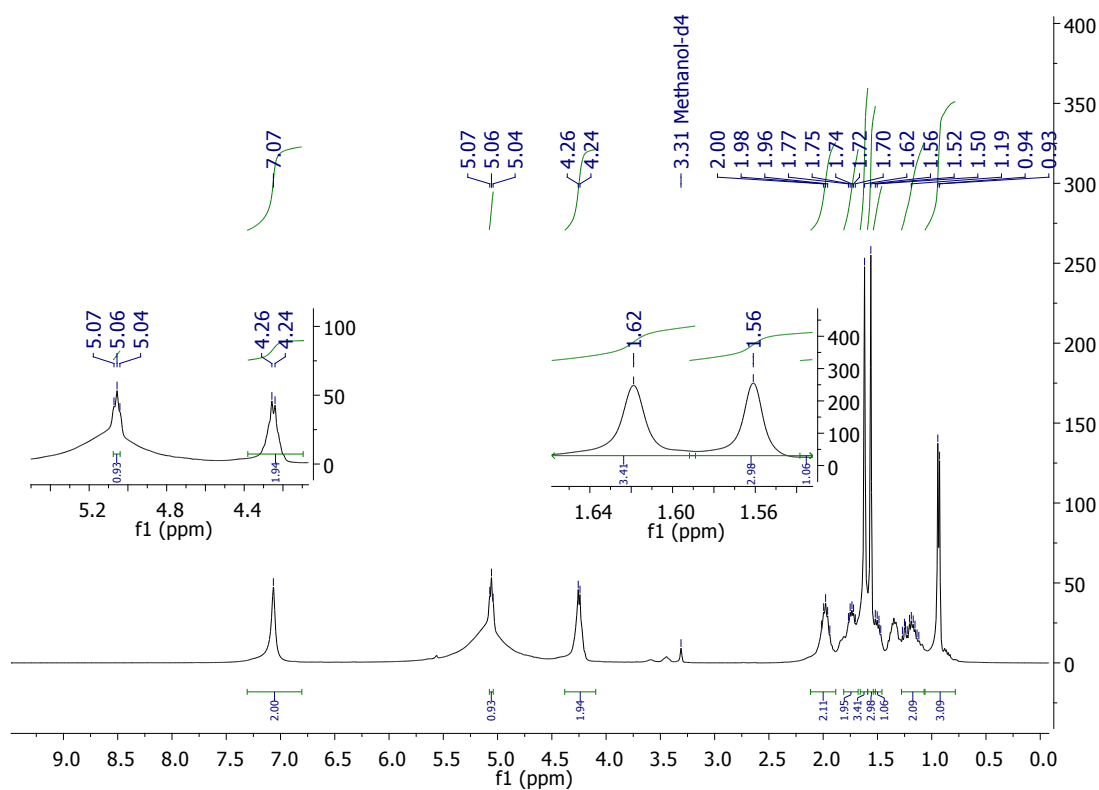

Figure S36:  $^1\text{H-NMR}$  (400 MHz,  $\text{CD}_3\text{OD}$ ) spectrum of the compound **Citronellyl gallate**

GabriellaS\_EAG-9\_CD30I

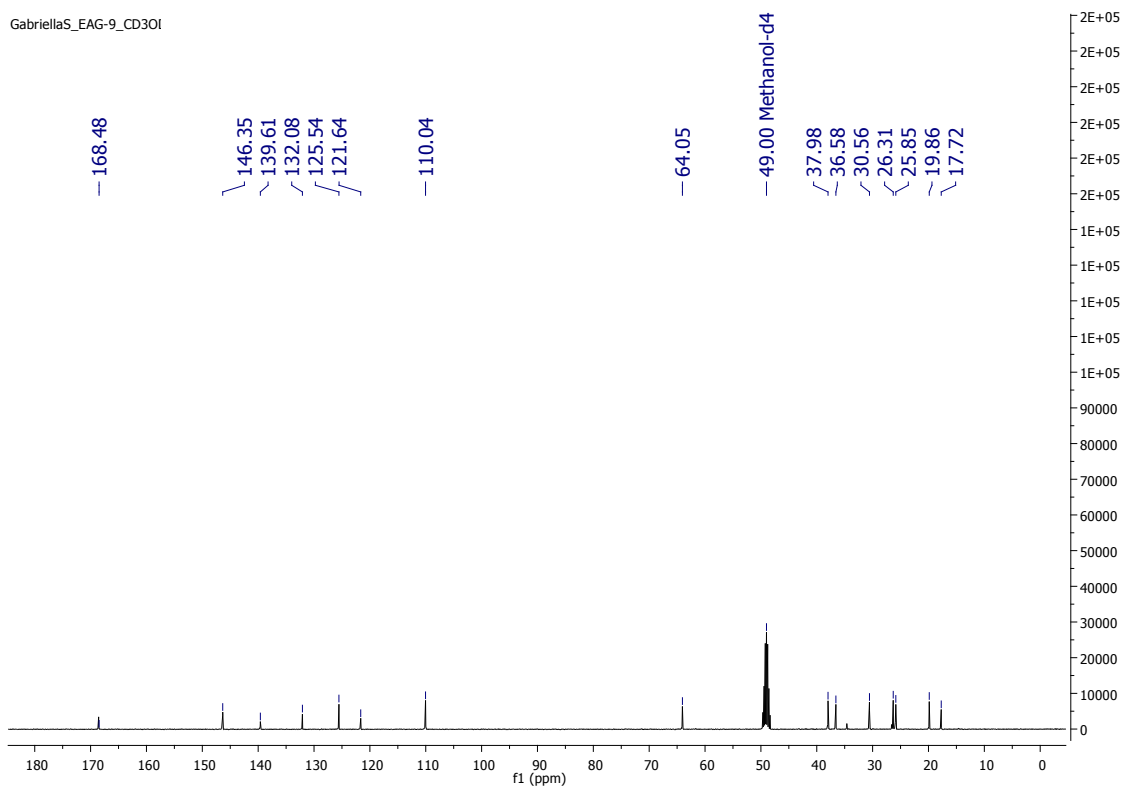

Figure S37:  $^{13}\text{C}$ -NMR (100 MHz,  $\text{CD}_3\text{OD}$ ) spectrum of the compound **Citronellyl gallate**

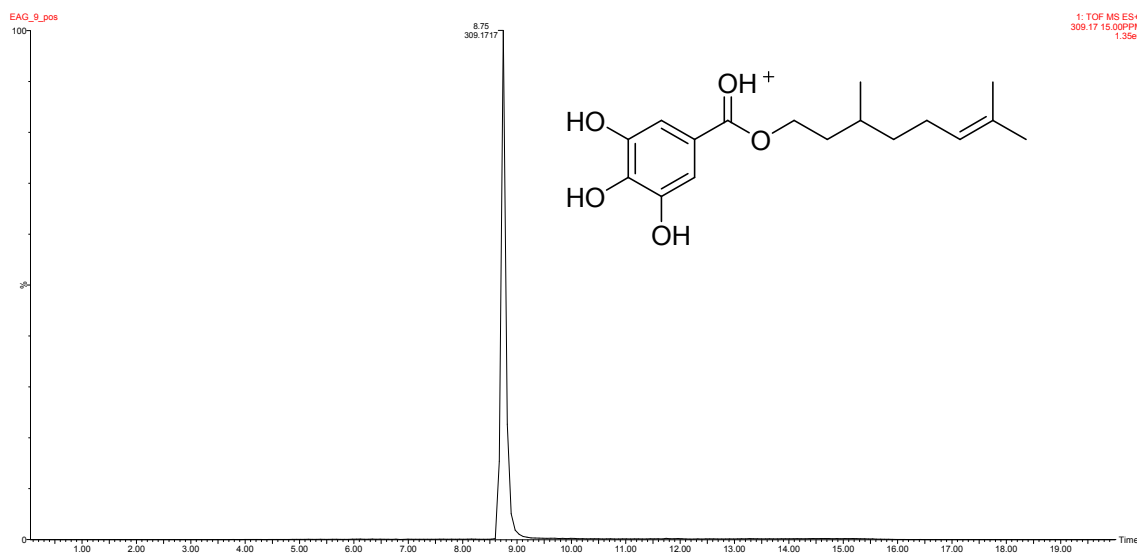

Figure S38: UPLC-ESI-MS of the compound **Citronellyl gallate**



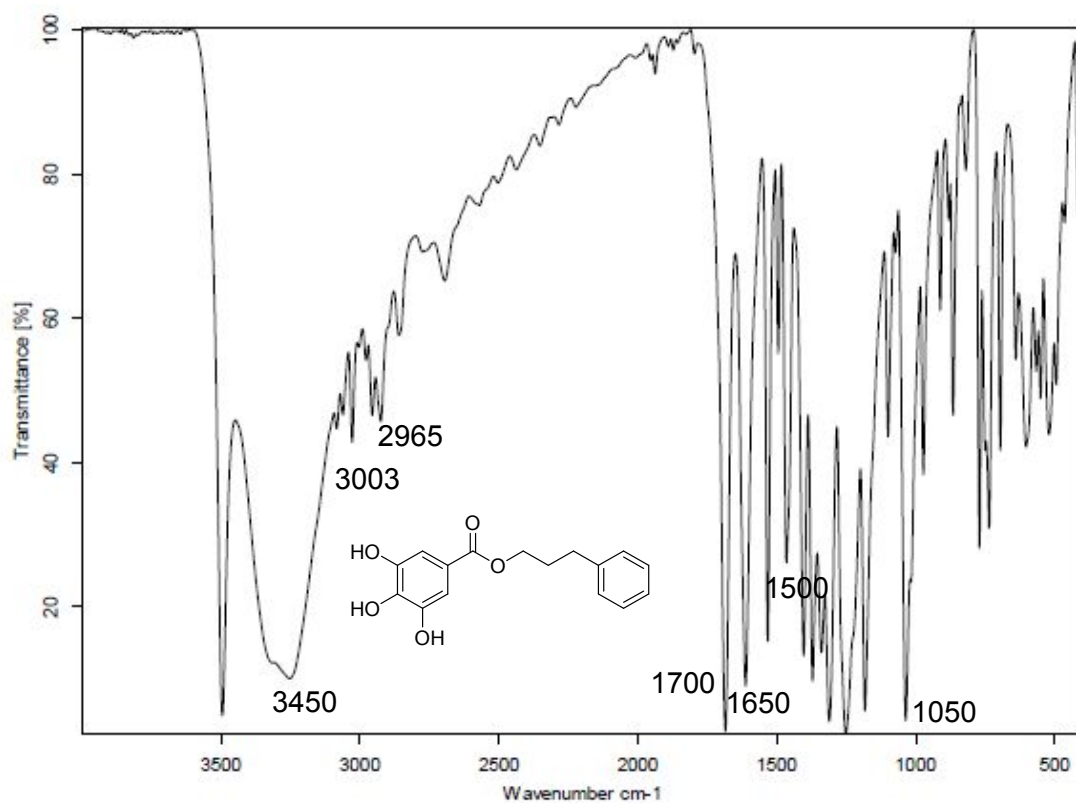

Figure S39: IR spectrum of the compound **3-Phenyl propyl gallate**

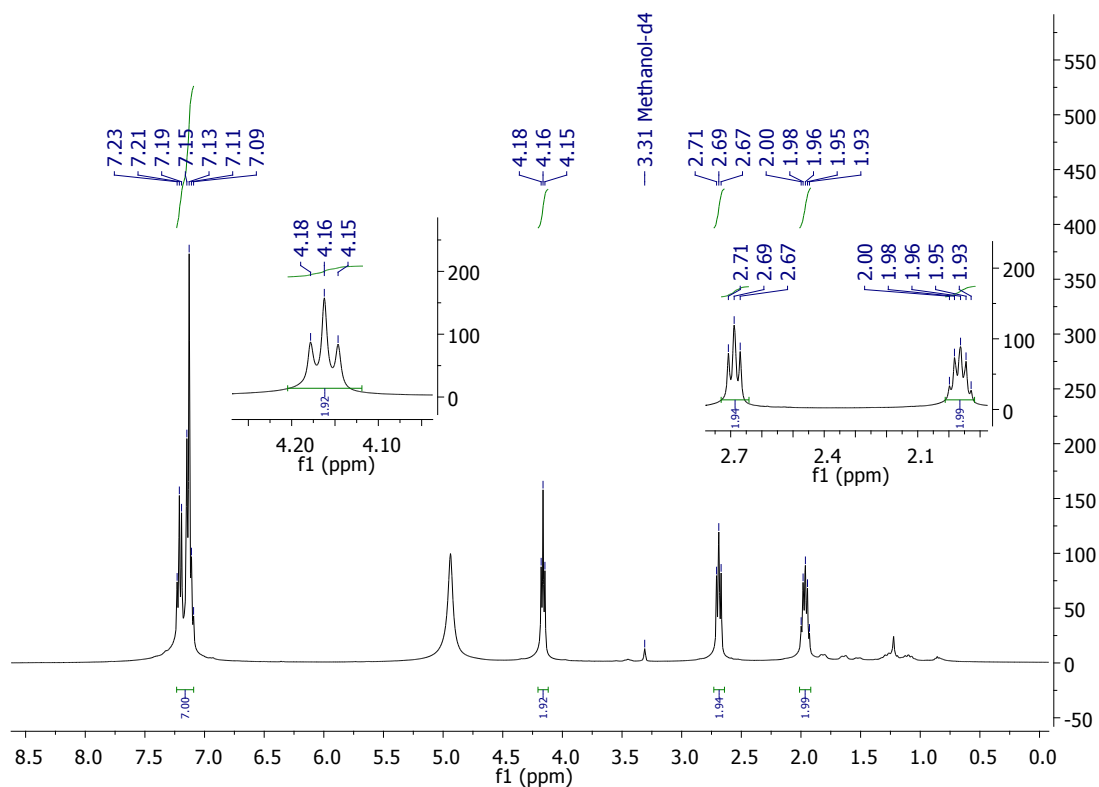

Figure S40:  $^1\text{H-NMR}$  (400 MHz,  $\text{CD}_3\text{OD}$ ) spectrum of the compound **3-Phenyl propyl gallate**.

GabriellaS\_EAG-10\_CD30I

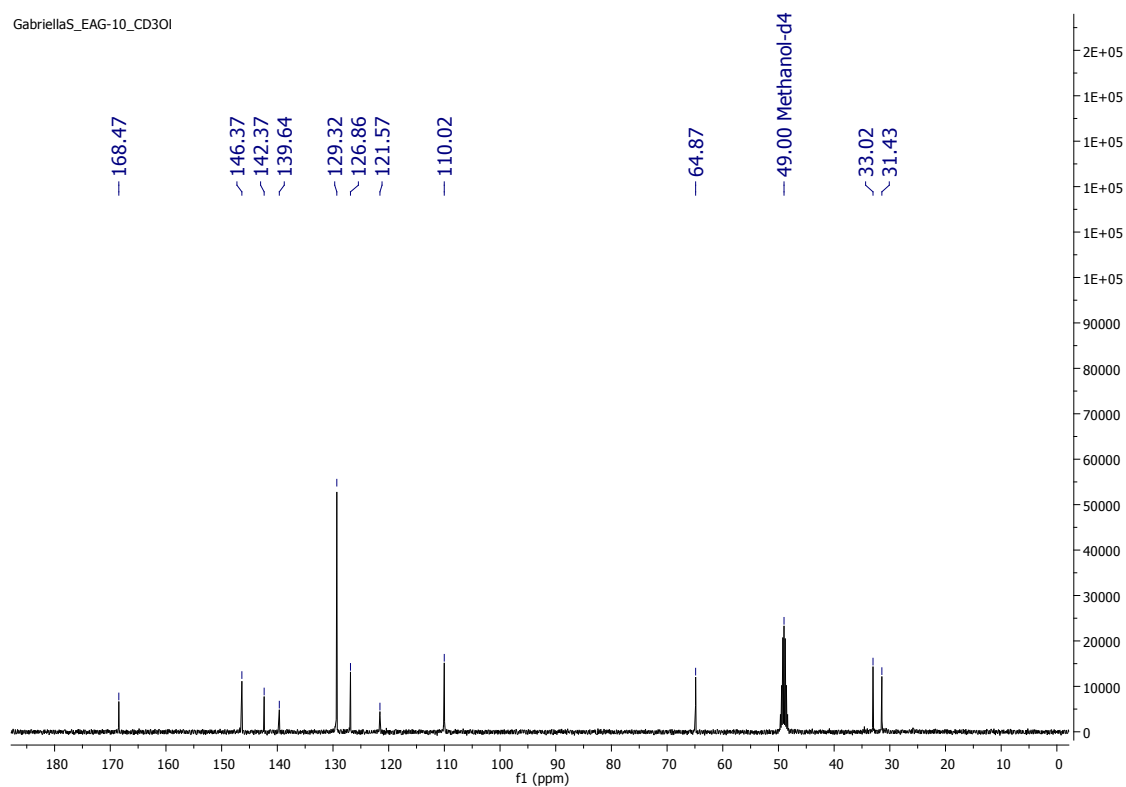

Figure S41:  $^{13}\text{C}$ -NMR (100 MHz,  $\text{CD}_3\text{OD}$ ) spectrum of the compound **3-Phenyl propyl gallate**.

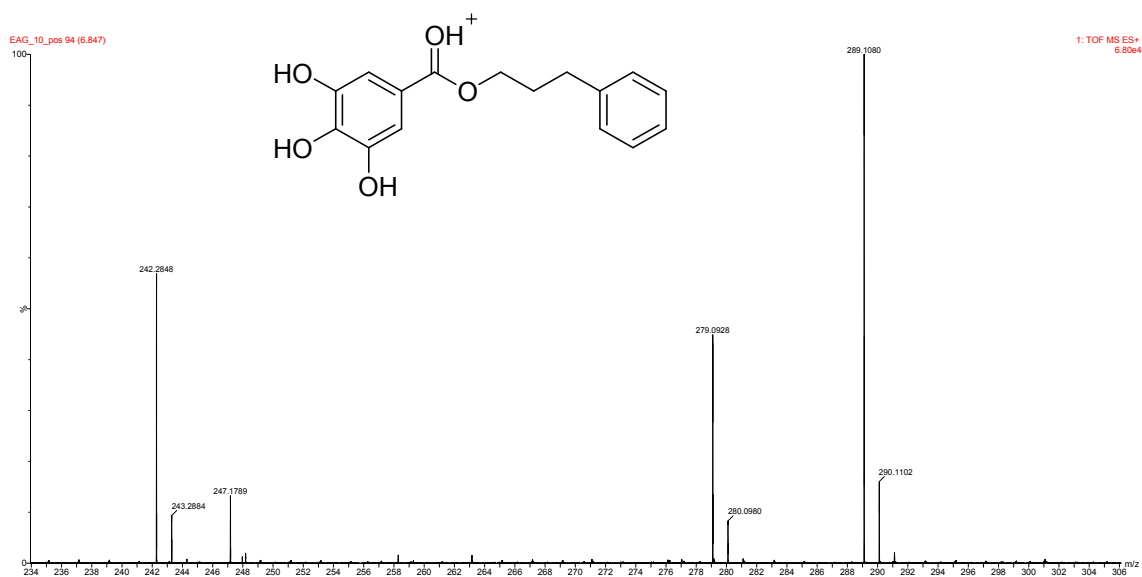

Figure S42: UPLC-ESI-MS of the compound **3-Phenyl propyl gallate**.

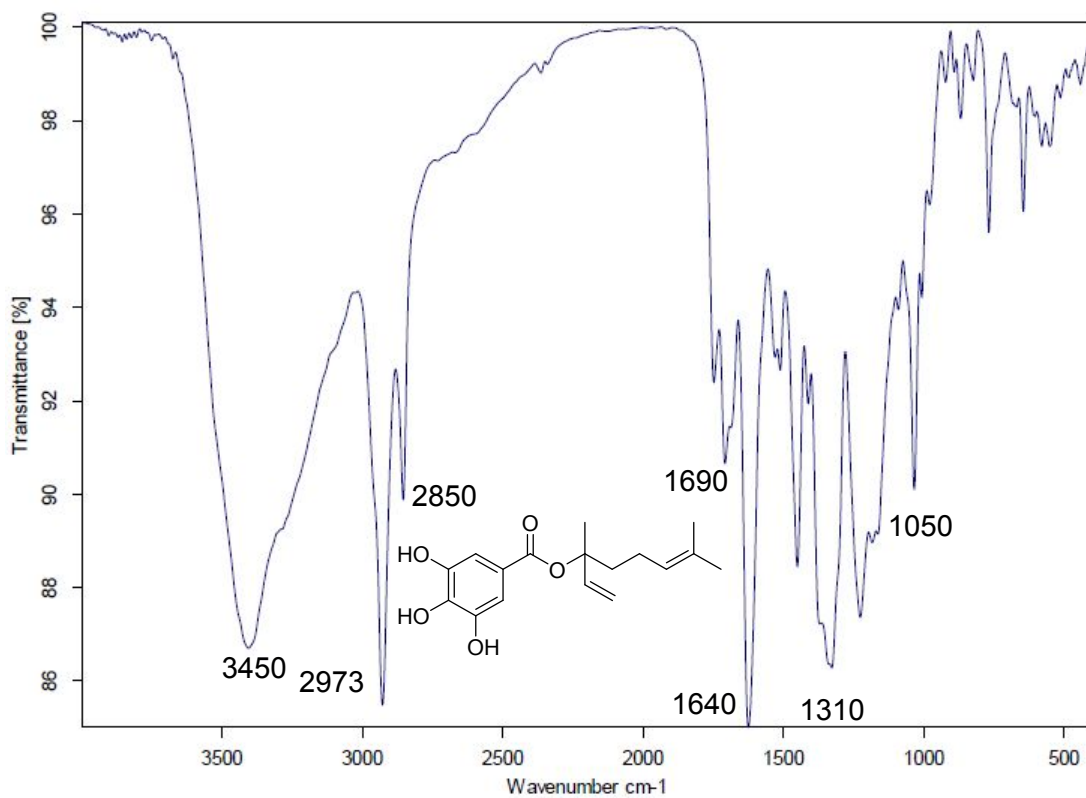

Figure S43: IR spectrum of the compound **Linalyl gallate**

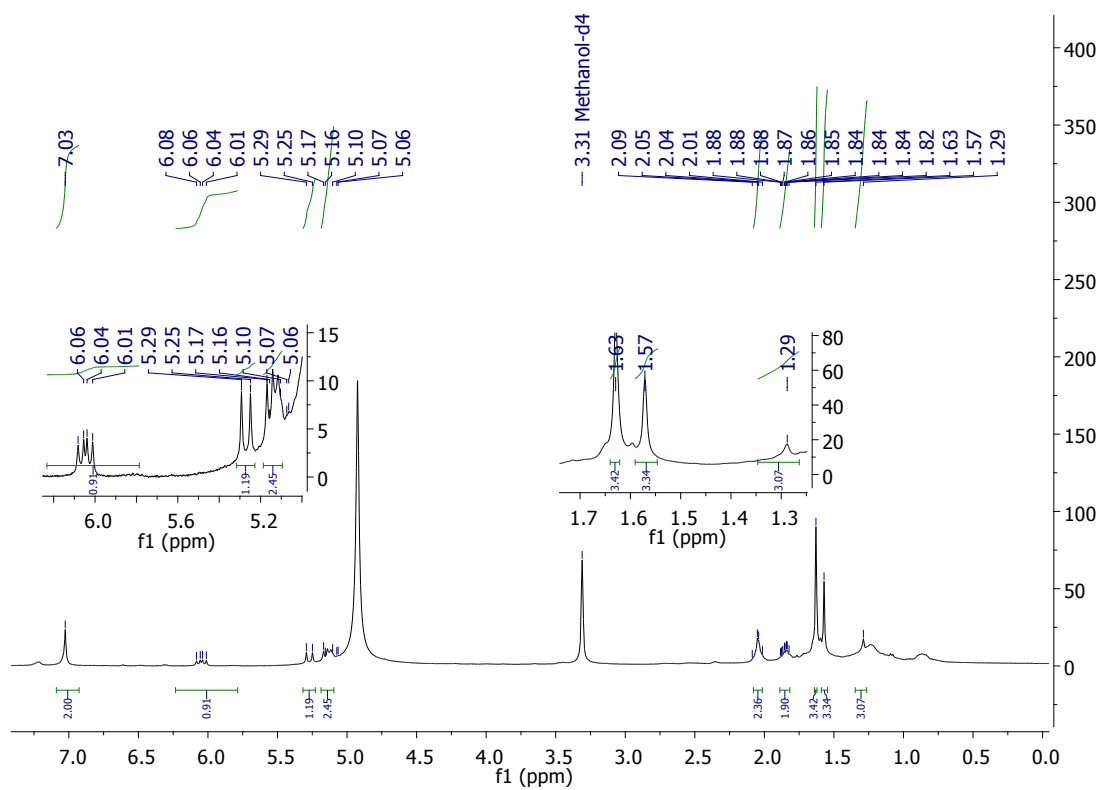

Figure S44: <sup>1</sup>H-NMR (400 MHz, CD<sub>3</sub>OD) spectrum of the compound **Linalyl gallate**

GabriellaS\_EAG-11\_CD30I

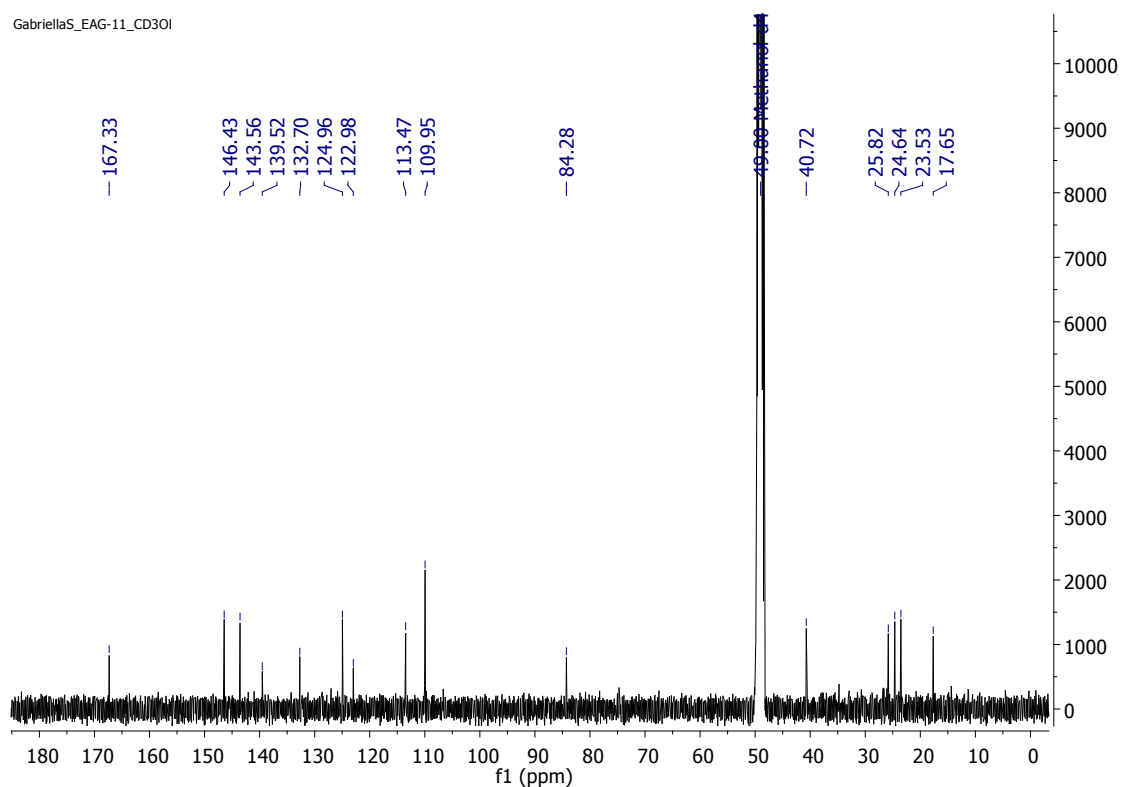

Figure S45:  $^{13}\text{C-NMR}$  (100 MHz,  $\text{CD}_3\text{OD}$ ) spectrum of the compound **Linalyl gallate**

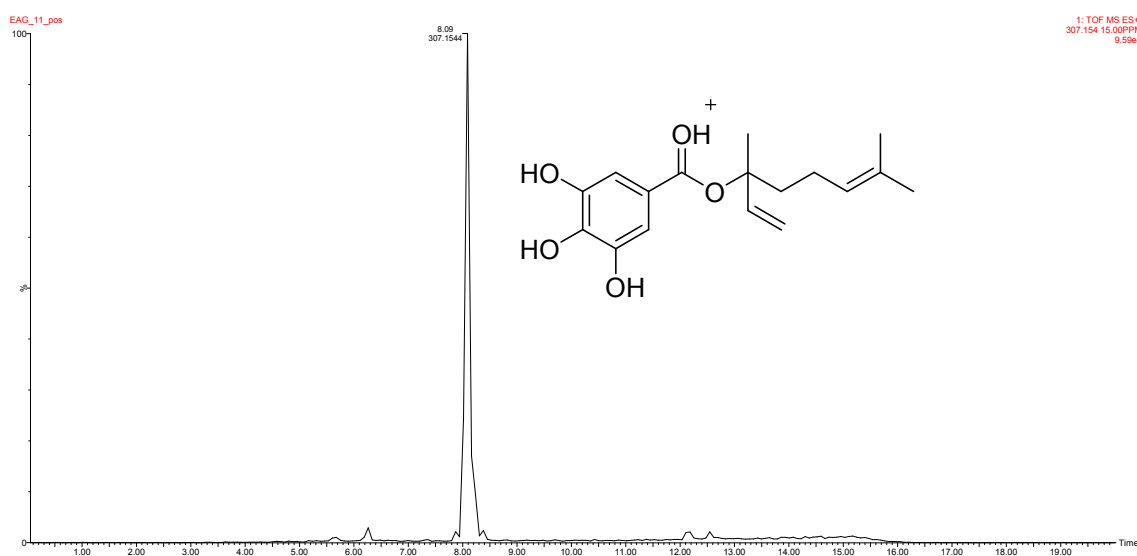

Figure S46: UPLC-ESI-MS of the compound **Linalyl gallate**

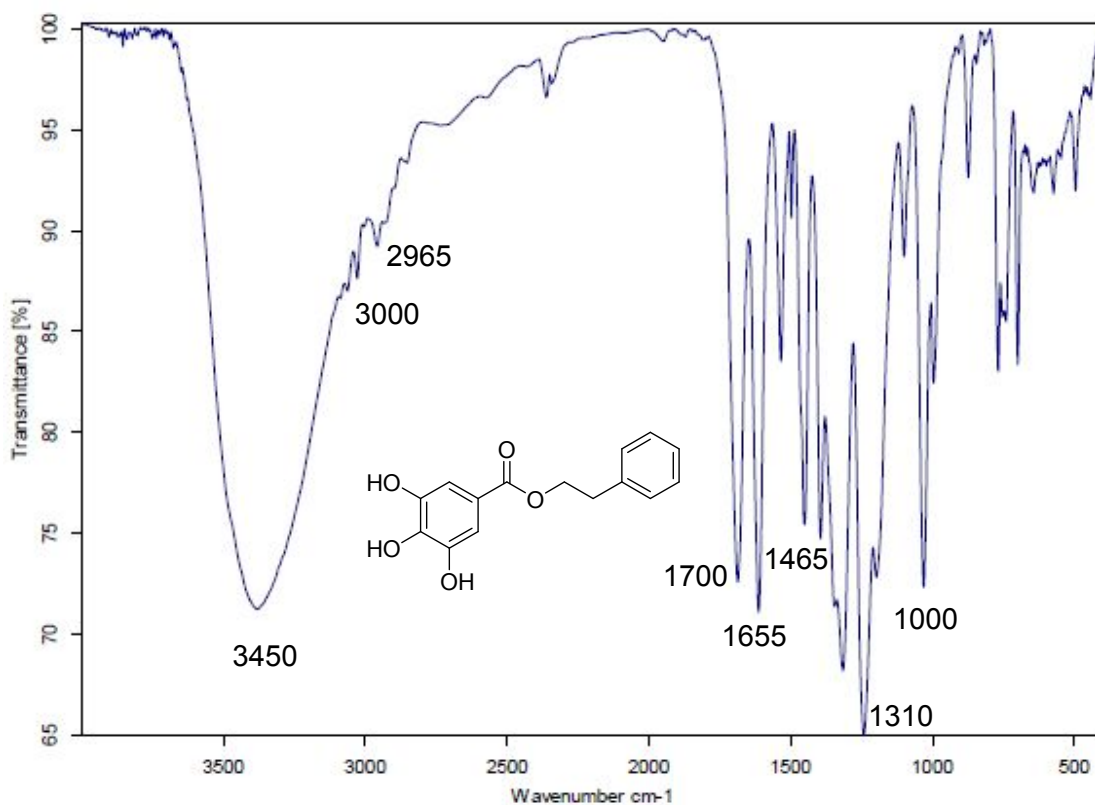

Figure S47: IR spectrum of the compound **2-Phenyl ethyl gallate**

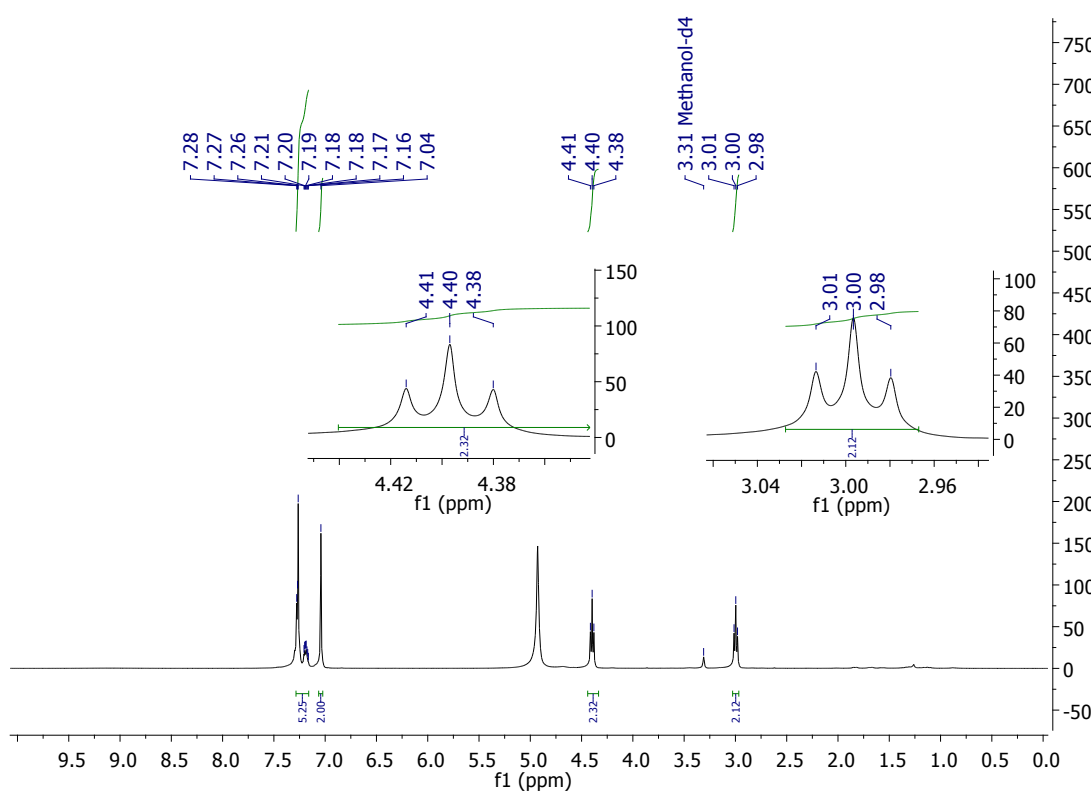

Figure S48: <sup>1</sup>H-NMR (400 MHz, CD<sub>3</sub>OD) spectrum of the compound **2-Phenyl ethyl gallate**

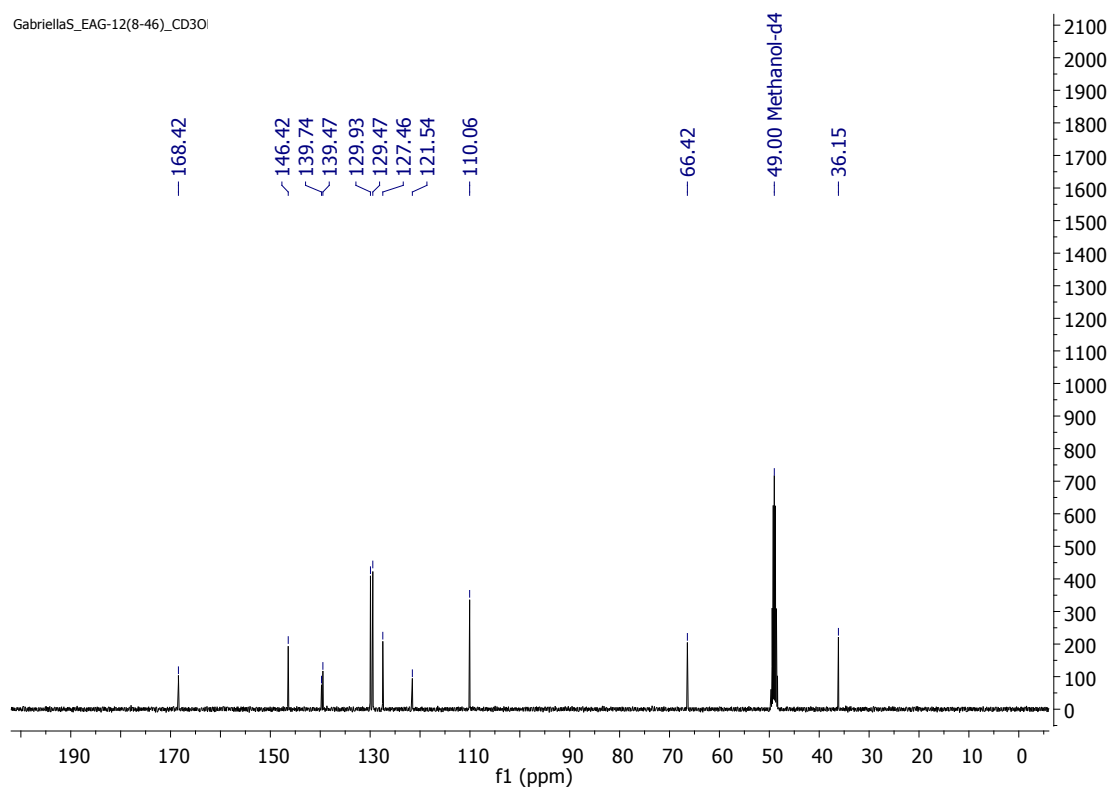

Figure S49:  $^{13}\text{C}$ -NMR (100 MHz,  $\text{CD}_3\text{OD}$ ) spectrum of the compound **2-Phenyl ethyl gallate**

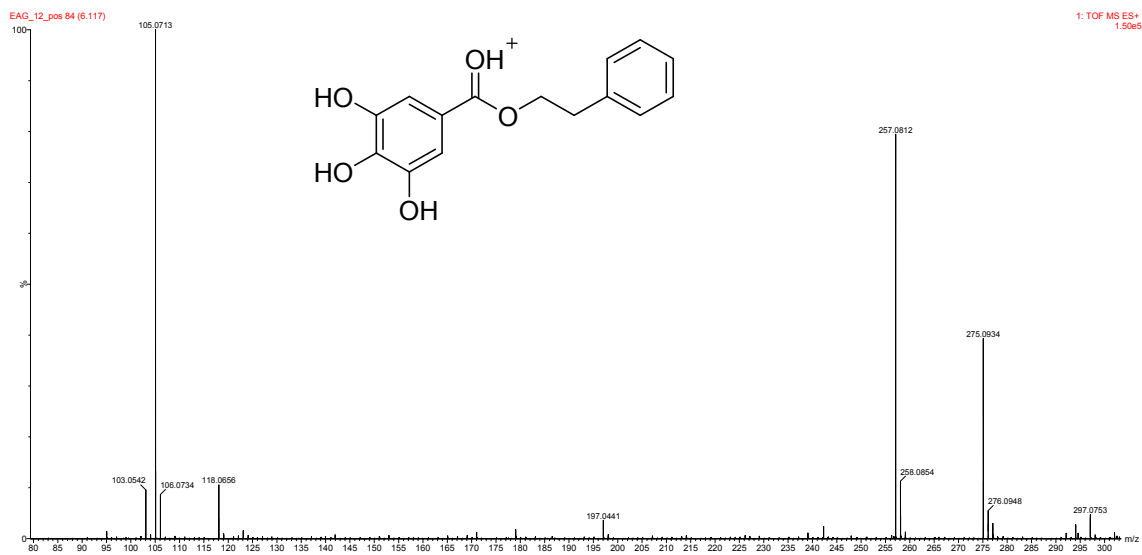

Figure S50: UPLC-ESI-MS of the compound **2-Phenyl ethyl gallate**

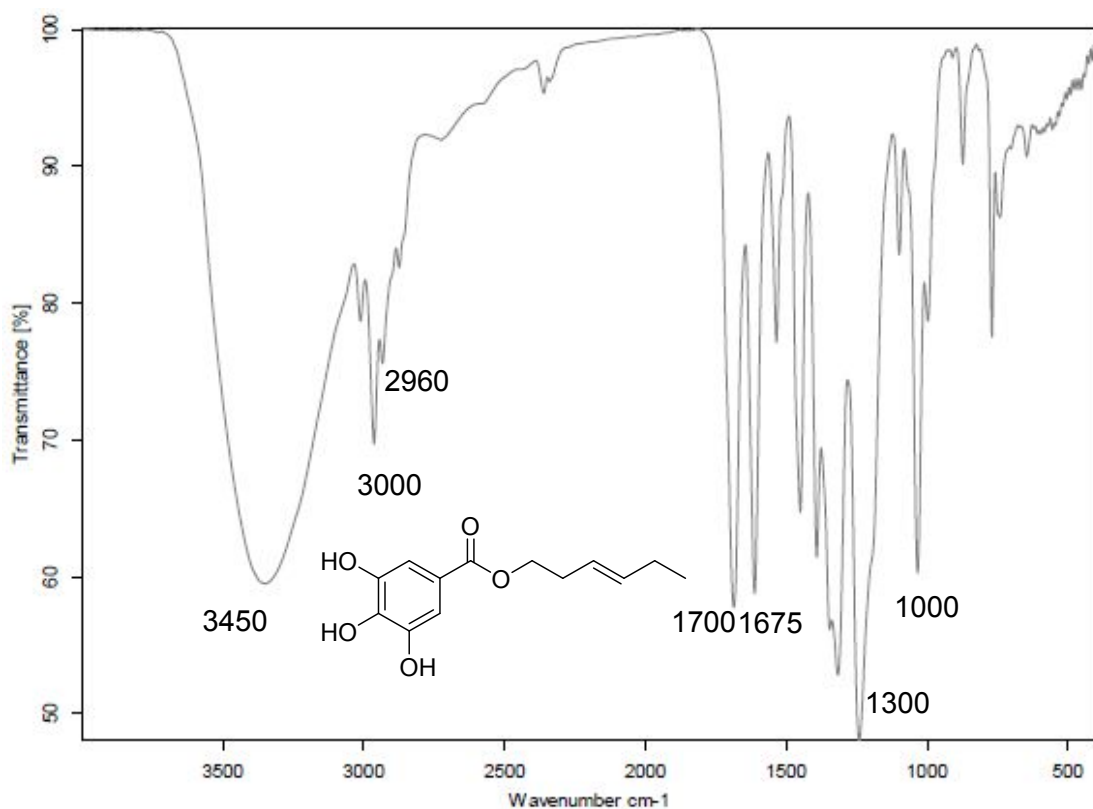

Figure S51: IR spectrum of the compound **Hex-3-enyl gallate**

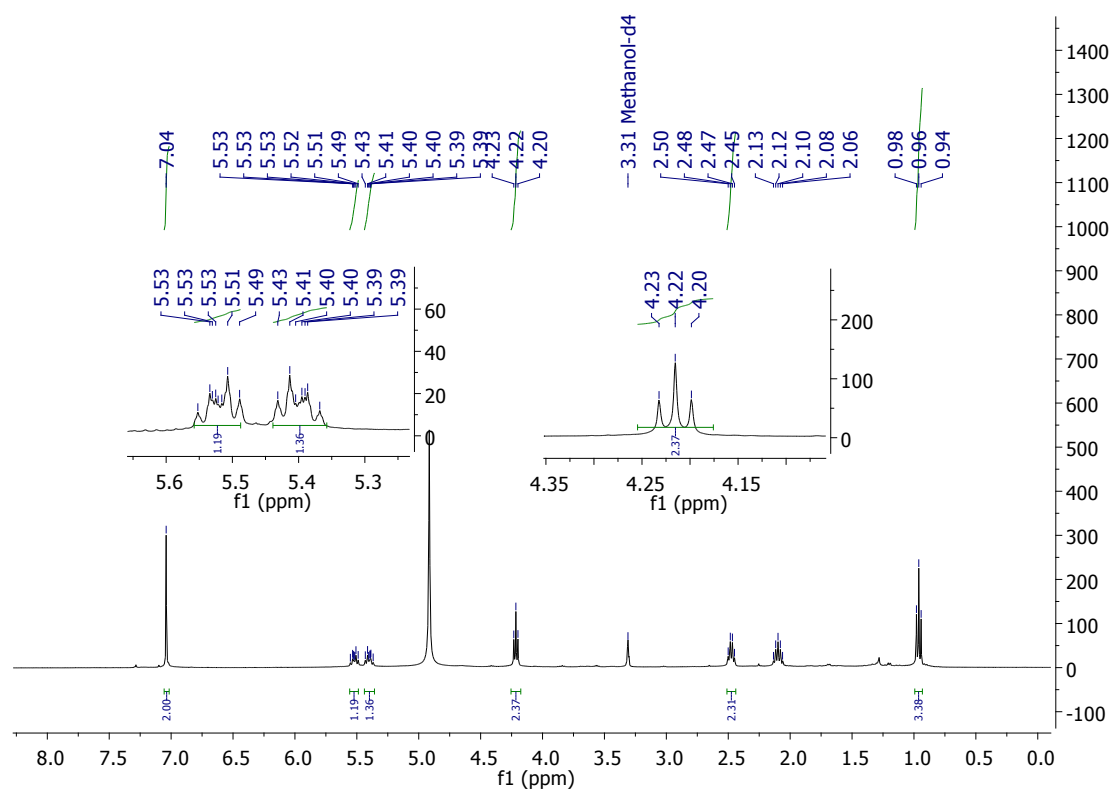

Figure S52: <sup>1</sup>H-NMR (400 MHz, CD<sub>3</sub>OD) spectrum of the compound **Hex-3-enyl gallate**

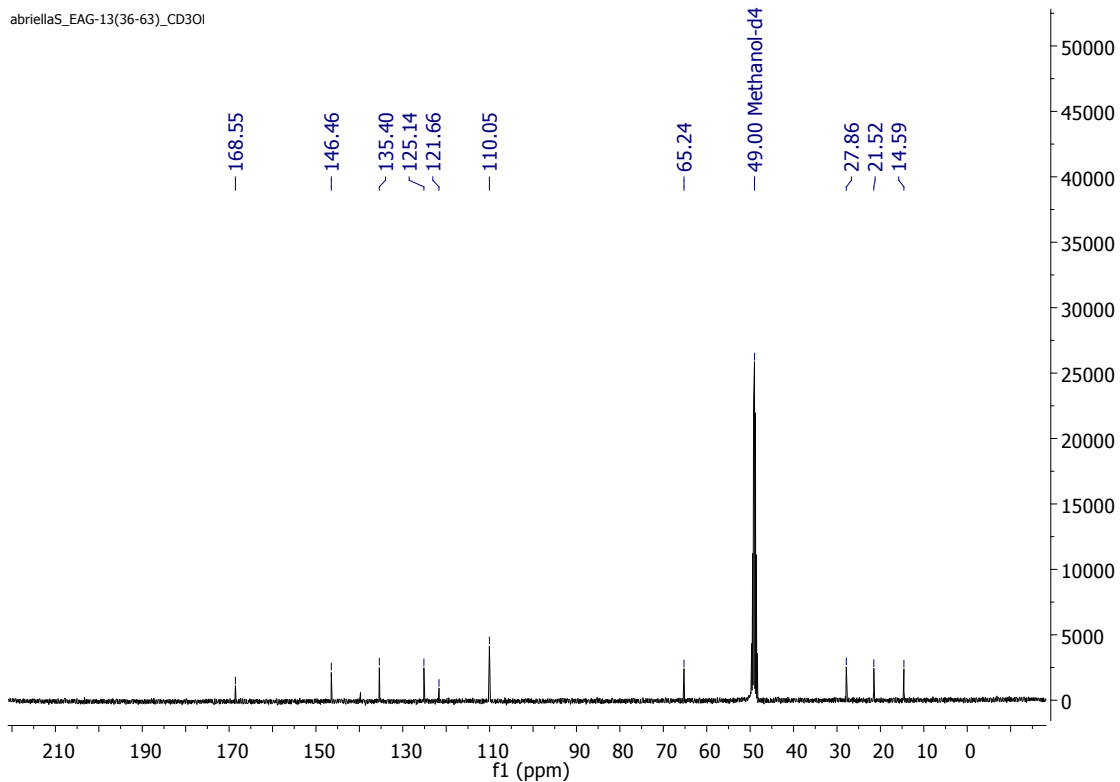

Figure S53:  $^{13}\text{C}$ -NMR (100 MHz,  $\text{CD}_3\text{OD}$ ) spectrum of the compound **Hex-3-enyl gallate**

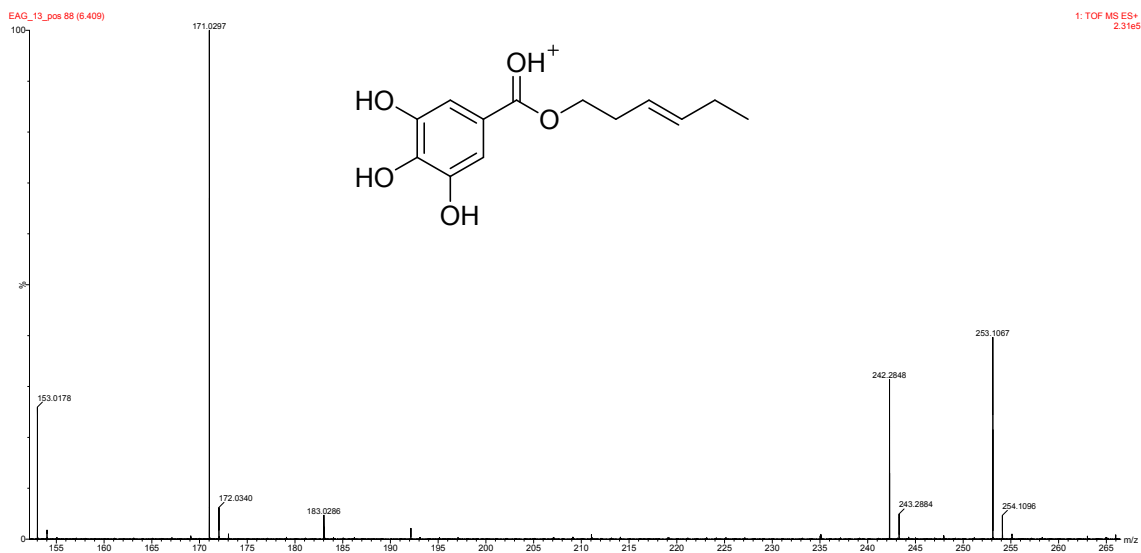

Figure S54: UPLC-ESI-MS of the compound **Hex-3-enyl gallate**



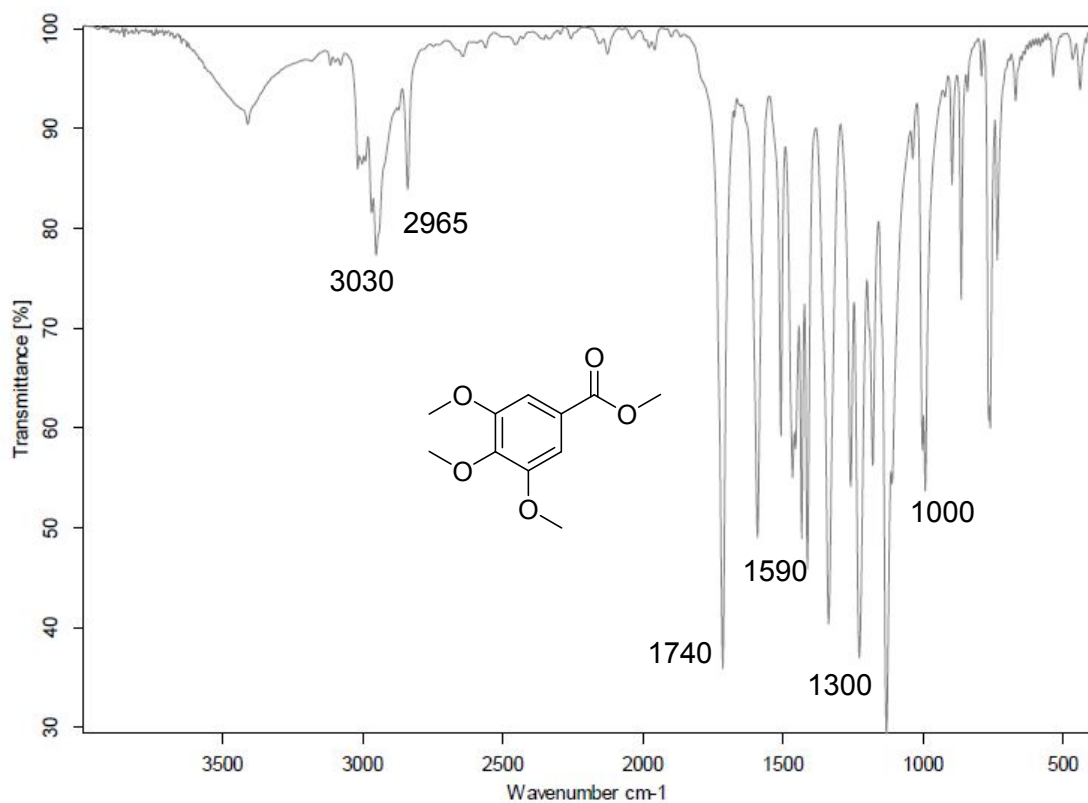

Figure S55: IR spectrum of the compound **Benzoic acid, 3,4,5-trimethoxy-methyl ester**

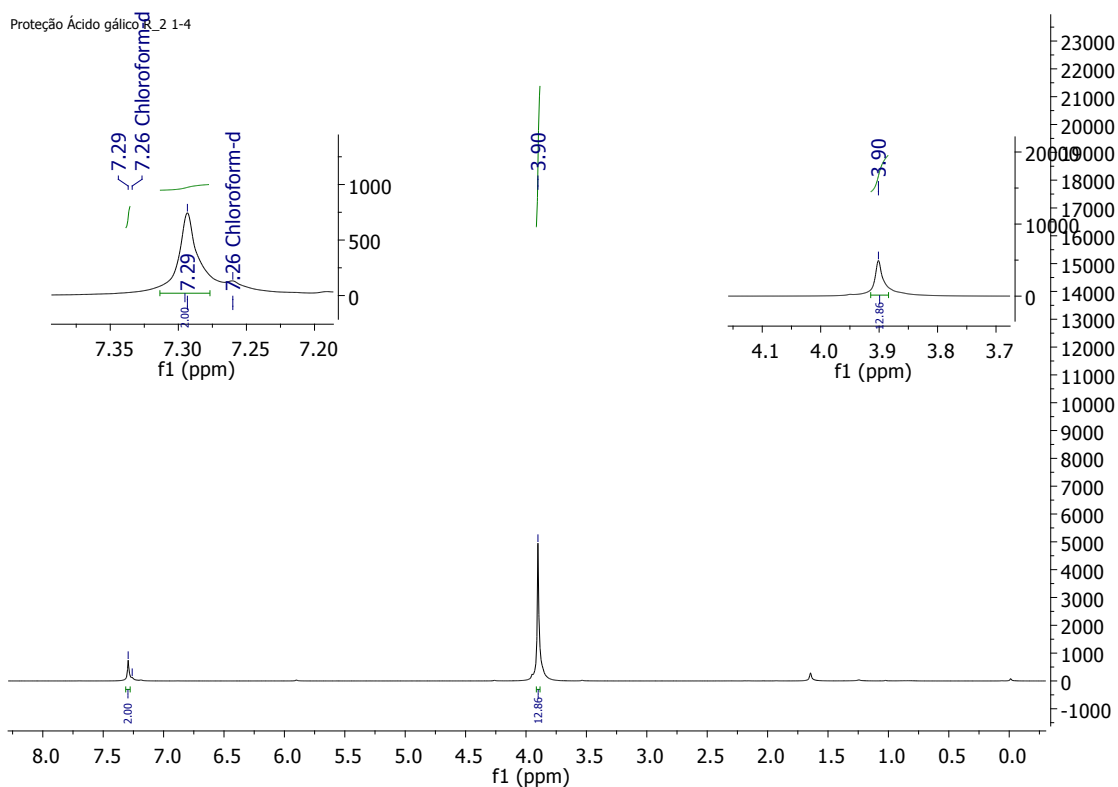

Figure S56: <sup>1</sup>H-NMR (200 MHz, CDCl<sub>3</sub>) spectrum of the compound **Benzoic acid, 3,4,5-trimethoxy-methyl ester**

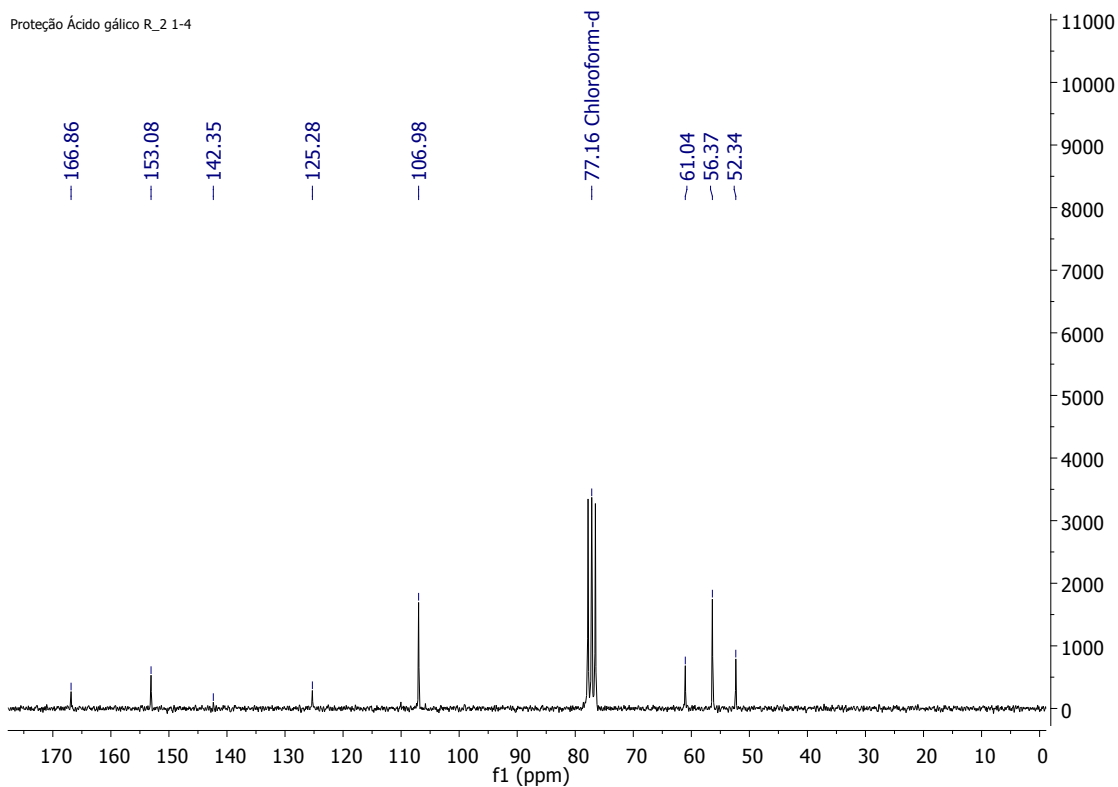

Figure S57:  $^1\text{H-NMR}$  (50 MHz,  $\text{CDCl}_3$ ) spectrum of the compound **Benzoic acid, 3,4,5-trimethoxy-methyl ester**.

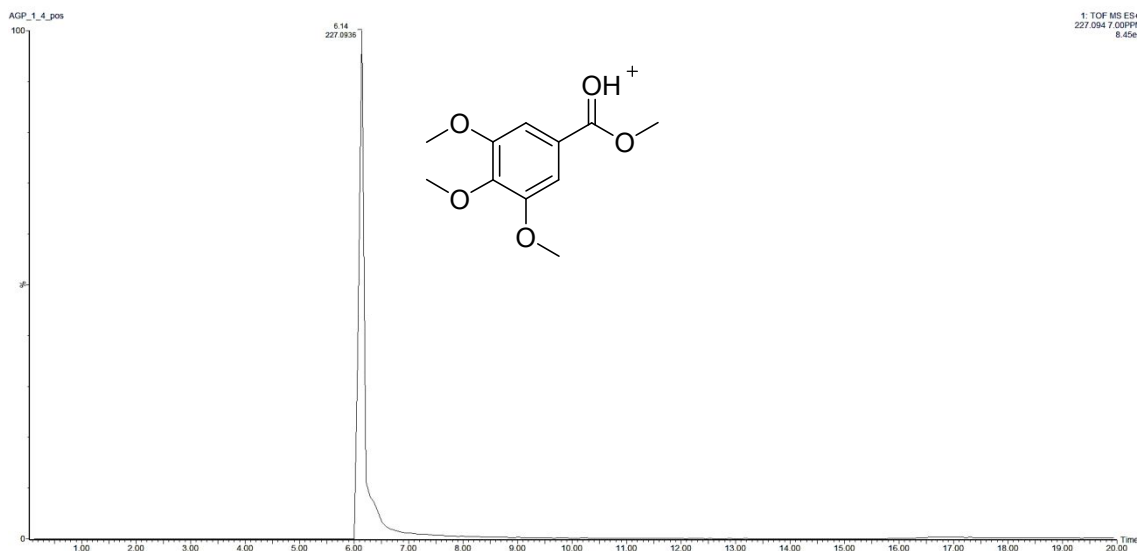

Figure S58: UPLC-ESI-MS of the compound **Benzoic acid, 3,4,5-trimethoxy-methyl ester**.

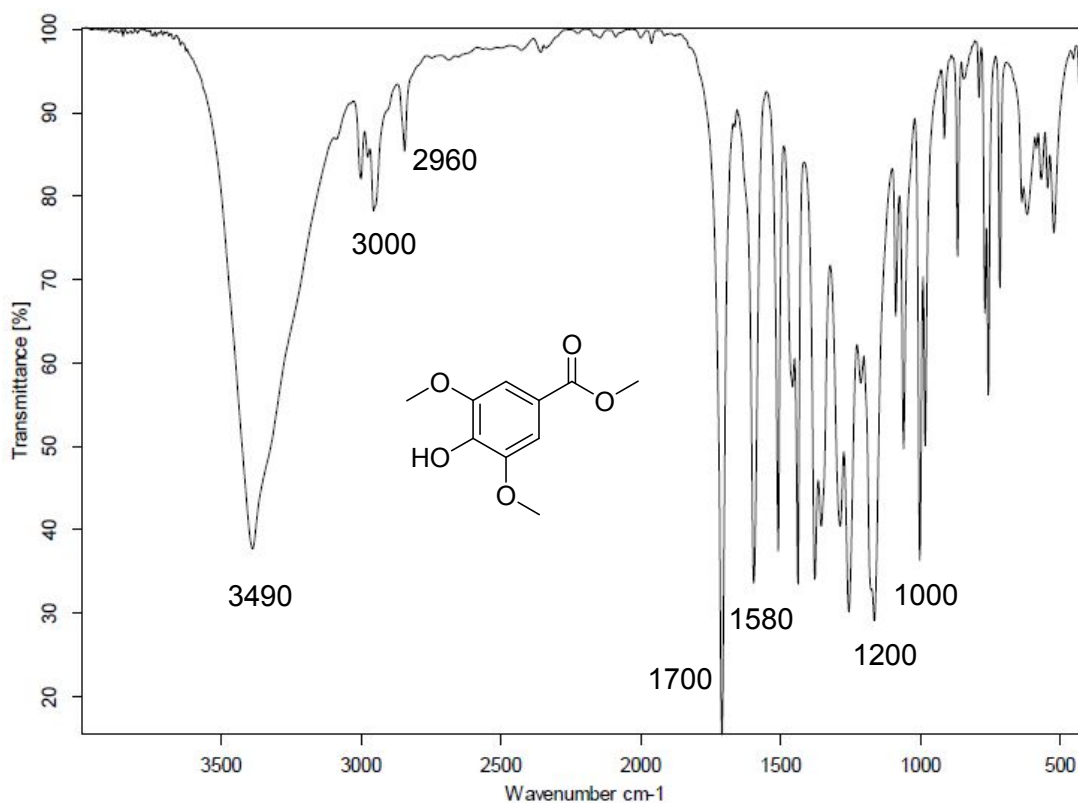

Figure S59: IR spectrum of the compound **4-hydroxy-3,5-dimethoxy-methyl ester**

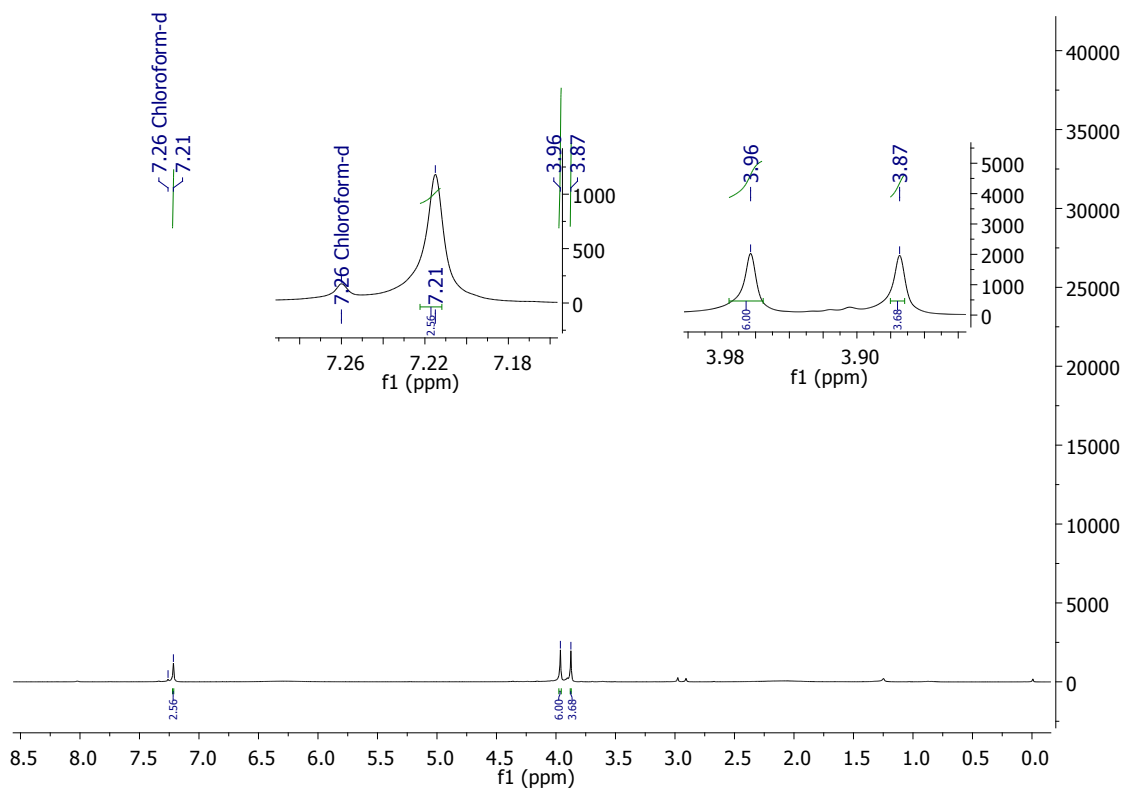

Figure S60:  $^1\text{H-NMR}$  (200 MHz,  $\text{CDCl}_3$ ) spectrum of the compound **4-hydroxy-3,5-dimethoxy-methyl ester**

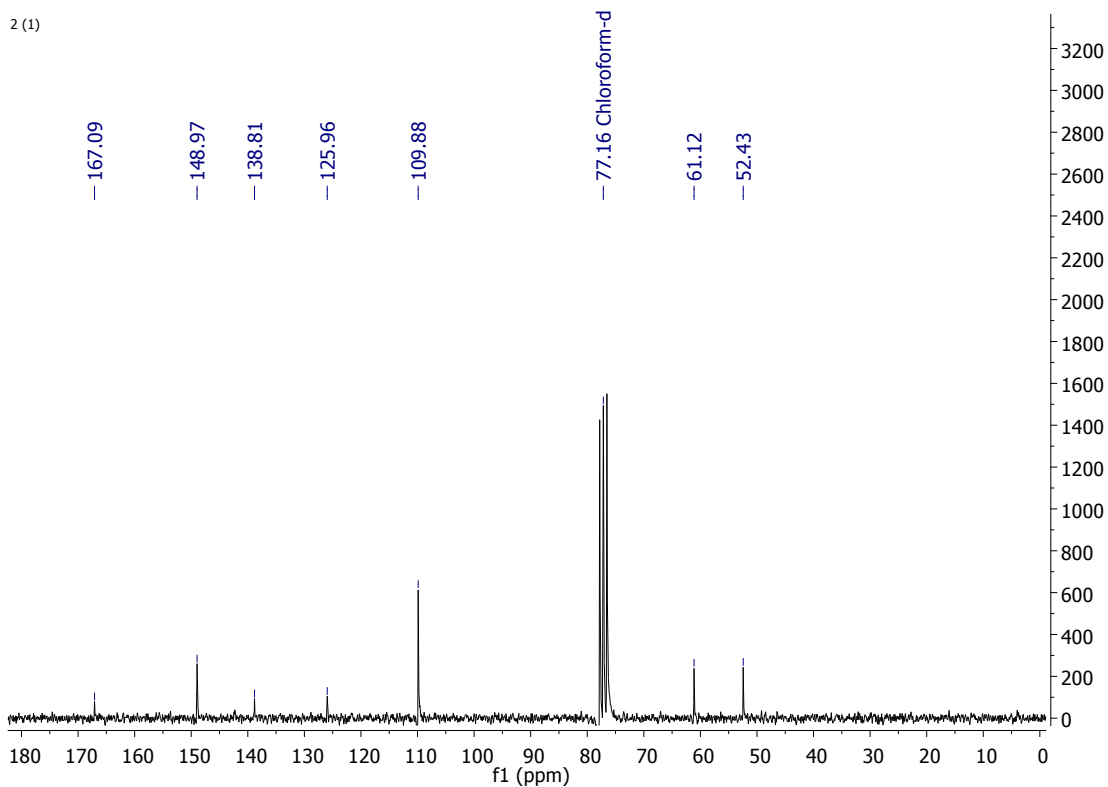

Figure S61:  $^{13}\text{C}$ -NMR (50 MHz,  $\text{CDCl}_3$ ) spectrum of the compound **4-hydroxy-3,5-dimethoxy-methyl ester**

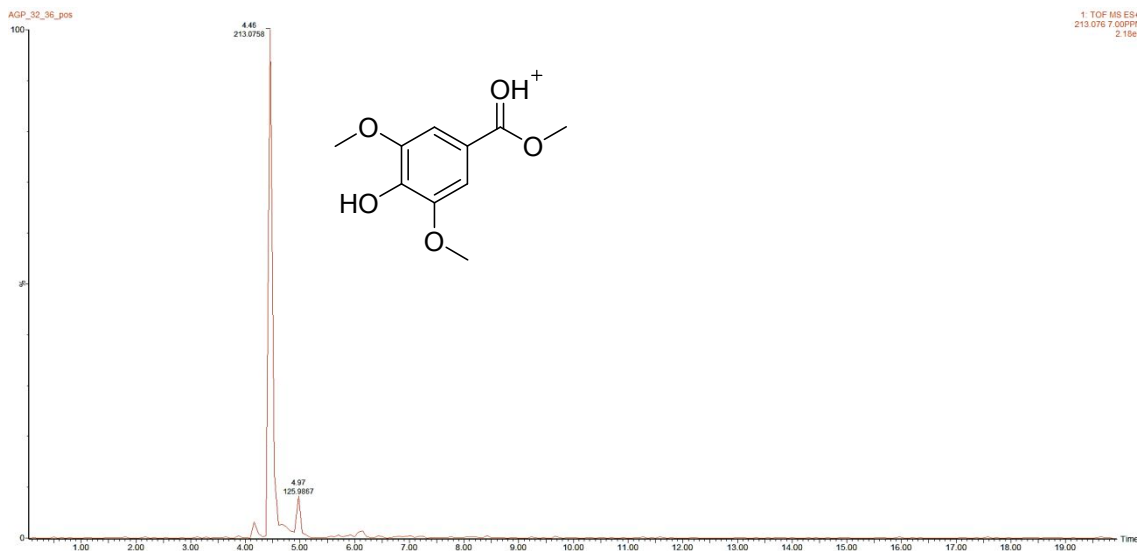

Figure S62: UPLC-ESI-MS of the compound **4-hydroxy-3,5-dimethoxy-methyl ester**.
